# Supplementary material for: Tor1 and CK2 kinases control a switch between alternative ribosome biogenesis pathways in a growth-dependent manner
Source: PLoS Biol. 2017 Mar 10;15(3):e2000245. doi: 10.1371/journal.pbio.2000245 (PMC5345768; doi:10.1371/journal.pbio.2000245)
Supplement: S1 Data — (XLSX) [file pbio.2000245.s012.xlsx]

## Sheet: Data explanation
This spreadsheet provides numerical values form mass spec analyses used to provide graphical data in the figures.
Tab	Description
1. Diauxic shif SILAC	results of the SILAC mass spec analyses of proteomic changes occuring during diauxic shift. Used in Fig 2C,D and S10
2. Rapamycin SILAC	results of the SILAC mass spec analyses of proteomic changes induced by the rapamycin treatment. Used in Fig 3C, D and E, and S10.
3.TBB SILAC	results of the SILAC mass spec analyses of proteomic changes induced by the TBB treatment. Used in Fig 6C and S10.
4. Diauxic shif phospho	List of phosphosites identified and their changes induced by diauxic shift. Used in Fig 7A
5. Rapamycin phospho	List of phosphosites identified and their changes induced by rapamycin treatment. Data not graphically presented.
6. TBB phospho	List of phosphosites identified and their changes induced by TBB treatment. Used in Fig 7B
7. RPSs composition	Enrichment ratios (H/L normalized to bait Pwp2) of ribosomal proteins of small subunit identified in pre-ribosomes from various treaments. The data is filtered subset of results in tabs 1-3. Used to obtain S10 Fig.

## Sheet: 1.Diauxic shift SILAC(Fig 2C,D)
	H/L normalized to the bait Pwp2				Experiment 1				Experiment 2
ORF Name	Experiment 1	Experiment 2	Average H/L		iBAQ	iBAQ L	iBAQ H		iBAQ	iBAQ L	iBAQ H
ACC1	#N/A	0.86615	#N/A		6509700	4195700	2313900		#N/A	#N/A	#N/A
ACT1	0.073281	#N/A	#N/A		322110	297220	24891		#N/A	#N/A	#N/A
ADH1	1.22788	1.97925	1.60356		295030	181230	113810		1620000	765140	854830
AIM22	#N/A	#N/A	#N/A		#N/A	#N/A	#N/A		#N/A	#N/A	#N/A
AIR1	0.962749	0.77136	0.867055		321760	213310	108450		3650900	2206600	1444300
ASC1	0.849432	1.18255	1.01599		151440	105480	45961		4585400	2401100	2184300
ASK10	#N/A	#N/A	#N/A		13950	7781.3	6168.6		112480	73091	39392
BFR2	5.42988	3.20869	4.31928		14502000	3563400	10939000		31714000	9274600	22439000
BMS1	3.31067	2.41441	2.86254		19103000	6701100	12402000		40067000	14464000	25602000
BOI1	#N/A	#N/A	#N/A		0	0	0		#N/A	#N/A	#N/A
BRX1	#N/A	0.47517	#N/A		129990	89496	40496		7850600	5245500	2605100
BUD21	1.70216	1.47522	1.58869		40350000	20698000	19652000		25804000	12437000	13367000
BUD22	#N/A	0.47925	#N/A		0	0	0		1785000	1122200	662780
CBF5	0.606519	0.795439	0.700979		5494700	4109600	1385100		38857000	23995000	14862000
CCT8	0.936469	0.836628	0.886548		171530	108800	62731		449150	272350	176800
CDC14	0.60584	#N/A	#N/A		68174	45799	22375		436280	254090	182190
CDC19	#N/A	0.94781	#N/A		40357	20115	20242		926780	464930	461860
CDC25	0.9633	#N/A	#N/A		#N/A	#N/A	#N/A		#N/A	#N/A	#N/A
CDC48	0.33857	#N/A	#N/A		28815	20332	8482.8		#N/A	#N/A	#N/A
CIC1	1.30868	1.90083	1.60475		397000	218280	178730		12883000	5253700	7628900
CKB1	#N/A	0.65326	#N/A		94209	62782	31426		2099400	1372400	727030
CKB2	#N/A	0.65898	#N/A		87363	49098	38265		1455700	888550	567160
CLU1	0.56203	#N/A	#N/A		31761	19830	11931		#N/A	#N/A	#N/A
DBP10	#N/A	0.61443	#N/A		54170	29573	24597		638440	371620	266820
DBP2	0.56111	#N/A	#N/A		86439	47159	39280		51709	32432	19276
DBP3	#N/A	#N/A	#N/A		25428	18904	6523.9		#N/A	#N/A	#N/A
DBP6	#N/A	0.42295	#N/A		0	0	0		1853600	1327800	525760
DBP7	#N/A	0.83431	#N/A		0	0	0		2450400	1228100	1222300
DBP9	1.63043	1.86342	1.74693		421280	202400	218890		13167000	5841300	7325900
DED1	0.980704	0.697613	0.839158		149250	91585	57666		958080	634900	323180
DHR2	0.752486	0.744025	0.748256		80839	48554	32285		3900700	2509100	1391600
DIP2	1.02643	1.11974	1.07309		196490000	125660000	70826000		512090000	275860000	236220000
DIS3	0.559639	0.252248	0.405943		312600	242950	69654		3282500	2599900	682540
DRS1	#N/A	0.74166	#N/A		6101.1	4233.3	1867.8		655970	386660	269310
EBP2	0.464872	0.708987	0.58693		828620	648040	180570		6602600	4291900	2310600
ECM11	#N/A	#N/A	#N/A		#N/A	#N/A	#N/A		#N/A	#N/A	#N/A
ECM16	0.642354	0.636653	0.639504		5567000	4162000	1405000		17331000	11572000	5759100
ECM32	#N/A	#N/A	#N/A		371220	247060	124160		#N/A	#N/A	#N/A
EFG1	3.85435	0.785866	2.32011		1357900	239130	1118800		4732700	3159300	1573400
EFT2	0.95109	1.22326	1.08718		802620	524390	278230		1257400	650240	607200
EMG1	3.95288	2.93437	3.44362		5018300	1604000	3414200		63217000	19769000	43448000
ENO2	1.54673	1.72058	1.63366		383720	222820	160900		3248200	1448800	1799400
ENP1	4.90073	4.06642	4.48357		7350000	1936700	5413200		44945000	11294000	33651000
ENP2	5.01006	3.15881	4.08444		10099000	2635000	7463900		42565000	12771000	29794000
ERB1	0.603744	0.625694	0.614719		914830	691390	223440		8818500	5874400	2944100
ESF1	0.411157	0.337356	0.374256		2067000	1514300	552660		5622900	4495900	1127000
ESF2	#N/A	0.45817	#N/A		83935	44660	39275		1753600	1170500	583040
FAF1	2.75396	2.40666	2.58031		3339700	1327000	2012700		12206000	4358500	7847800
FAS1	0.65658	#N/A	#N/A		86046	51278	34768		#N/A	#N/A	#N/A
FAS2	0.56443	#N/A	#N/A		19316	11274	8042.1		#N/A	#N/A	#N/A
FBA1	#N/A	2.2995	#N/A		99568	49075	50492		336340	137360	198980
FCF1	2.57571	1.6509	2.1133		1335600	614240	721400		9718400	4430800	5287600
FCF2	2.07003	1.68138	1.8757		6542200	2968600	3573600		33015000	14767000	18248000
FPR3	1.81263	1.8752	1.84391		9691900	4710000	4981800		50963000	21295000	29669000
FPR4	1.85299	1.93491	1.89395		2930700	1559100	1371500		25521000	10369000	15152000
FUN12	0.5956	#N/A	#N/A		8912.6	5435.6	3477		#N/A	#N/A	#N/A
GAR1	0.671298	0.870503	0.7709		1308800	963010	345760		18581000	11314000	7267000
GCD11	0.55427	#N/A	#N/A		73898	49576	24322		150440	86203	64240
GIN4	#N/A	#N/A	#N/A		0	0	0		#N/A	#N/A	#N/A
GPM1	#N/A	#N/A	#N/A		0	0	0		#N/A	#N/A	#N/A
HAS1	0.812479	0.966999	0.889739		2280100	1580200	699940		40111000	23165000	16946000
HCA4	0.270348	0.298646	0.284497		1473400	1263700	209780		15690000	12655000	3035500
HHF2	#N/A	0.72734	#N/A		0	0	0		827750	470340	357410
HHO1	#N/A	#N/A	#N/A		0	0	0		#N/A	#N/A	#N/A
HHT2	#N/A	#N/A	#N/A		345520	203320	142200		#N/A	#N/A	#N/A
HIS6	#N/A	#N/A	#N/A		#N/A	#N/A	#N/A		#N/A	#N/A	#N/A
HMO1	#N/A	#N/A	#N/A		0	0	0		#N/A	#N/A	#N/A
HSC82	1.13656	1.10625	1.12141		2398700	1489300	909390		679390	362650	316750
HSP82	#N/A	#N/A	#N/A		33073	18401	14672		#N/A	#N/A	#N/A
HTA2	0.506	#N/A	#N/A		1600500	1099700	500750		#N/A	#N/A	#N/A
HTB2	1.19195	0.98289	1.08742		1051200	626670	424490		1673300	980270	693050
IMD3	#N/A	0.60206	#N/A		94201	54261	39940		13291000	7530600	5760600
IMD4	1.15597	0.717923	0.936946		28998	17995	11003		2343700	1414800	928890
IMP3	2.1965	1.47397	1.83524		4605200	2152100	2453100		22094000	10781000	11313000
IMP4	2.06687	1.45402	1.76044		3397700	1662100	1735600		40588000	19650000	20938000
JIP5	#N/A	0.65843	#N/A		0	0	0		1368100	798520	569570
KCC4	#N/A	#N/A	#N/A		#N/A	#N/A	#N/A		#N/A	#N/A	#N/A
KRE33	4.74912	4.66548	4.7073		15366000	4498800	10867000		80205000	17845000	62360000
KRI1	1.14517	0.406559	0.775863		12738000	7754700	4983600		6824700	5217800	1606900
KRR1	3.47383	2.1908	2.83232		3935600	1411500	2524100		22412000	8683300	13728000
LCP5	5.96275	3.37023	4.66649		12698000	2998700	9698900		16975000	4873500	12101000
LOC1	1.16903	1.23553	1.20228		500550	315390	185160		6036500	3399200	2637200
MAK11	#N/A	1.8794	#N/A		0	0	0		8175800	3710100	4465700
MAK16	4.04694	3.71147	3.8792		1176800	346240	830550		8592100	2363800	6228300
MAK21	2.14584	2.00723	2.07653		713030	306730	406300		22387000	8838300	13549000
MAK5	1.10035	1.00272	1.05153		356560	222940	133620		9840700	5657500	4183200
MIS1	0.946452	0.807825	0.877138		22784	15478	7305.9		944990	541800	403190
MKK1	#N/A	#N/A	#N/A		#N/A	#N/A	#N/A		#N/A	#N/A	#N/A
MNE1	#N/A	#N/A	#N/A		#N/A	#N/A	#N/A		#N/A	#N/A	#N/A
MPP10	2.16186	1.46178	1.81182		48249000	22199000	26050000		62333000	29533000	32800000
MRD1	0.349842	0.263054	0.306448		122780	103540	19237		2815700	2252700	562970
MRS6	#N/A	#N/A	#N/A		0	0	0		#N/A	#N/A	#N/A
MRT4	#N/A	1.6842	#N/A		0	0	0		8022300	2891700	5130600
MSS116	#N/A	0.65051	#N/A		19841	10706	9134.9		2834500	1699600	1134900
MTC5	#N/A	#N/A	#N/A		#N/A	#N/A	#N/A		#N/A	#N/A	#N/A
MTR4	0.791507	0.4727	0.632103		171850	117440	54402		5896700	4219300	1677400
MYO2	#N/A	#N/A	#N/A		0	0	0		#N/A	#N/A	#N/A
#n/a1	1.64813	1.47605	1.56209		#N/A	#N/A	#N/A		#N/A	#N/A	#N/A
NET1	#N/A	#N/A	#N/A		8375.7	5039.8	3335.9		15984	9882.1	6102
NHP2	0.632501	0.800025	0.716263		3953500	2917800	1035700		37513000	23539000	13973000
NIP7	#N/A	2.66	#N/A		#N/A	#N/A	#N/A		5921500	1659600	4261900
NOB1	0.854424	1.2603	1.05736		505260	342300	162960		3892000	1870800	2021100
NOC2	2.41851	1.97814	2.19833		561420	241500	319920		13939000	5701000	8238200
NOC3	#N/A	0.79945	#N/A		0	0	0		289060	143550	145500
NOC4	3.59005	2.67779	3.13392		1380400	482380	898000		38385000	13628000	24757000
NOG1	7.70833	7.9803	7.84431		454440	85261	369180		9424100	1615600	7808500
NOP1	1.1534	1.07911	1.11625		20360000	12341000	8019500		290680000	161630000	129050000
NOP10	#N/A	0.63029	#N/A		409900	288680	121220		877790	505540	372250
NOP12	1.04079	1.63995	1.34037		746230	476530	269700		15959000	7172500	8786600
NOP13	0.725386	0.71917	0.722278		96623	63824	32799		2371800	1483400	888410
NOP14	3.62768	2.67543	3.15155		14493000	4813000	9679900		45406000	15156000	30250000
NOP15	1.49203	1.82228	1.65715		1115700	592200	523540		5605300	2524400	3080900
NOP16	#N/A	0.51328	#N/A		297210	167250	129960		1916200	1113800	802460
NOP2	3.40697	3.46666	3.43681		927650	321700	605950		13152000	3746000	9405800
NOP4	3.22276	3.00558	3.11417		421630	142980	278650		9251000	2874300	6376700
NOP53	#N/A	#N/A	#N/A		47918	29044	18875		#N/A	#N/A	#N/A
NOP56	1.2369	0.990246	1.11357		41287000	24849000	16438000		187980000	107980000	79998000
NOP58	1.17331	0.964436	1.06887		58546000	35608000	22938000		93253000	54006000	39247000
NOP6	0.45664	0.414594	0.435617		435830	361850	73975		3537200	2667400	869770
NOP7	0.734476	0.637388	0.685932		379340	277690	101640		4088800	2774300	1314600
NOP8	0.713001	0.59847	0.655736		80748	56946	23801		3402500	2368800	1033600
NOP9	#N/A	0.39404	#N/A		7303.2	7303.2	0		2295700	1597600	698140
NPL3	#N/A	#N/A	#N/A		67303	48541	18762		150770	102330	48437
NSA1	#N/A	1.1677	#N/A		0	0	0		3757700	1848600	1909100
NSR1	0.770907	0.724518	0.747713		3236300	2233100	1003200		16075000	10632000	5443200
NUG1	#N/A	0.88204	#N/A		13215	8384.2	4830.3		926890	492060	434830
PAB1	1.11674	0.954724	1.03573		1097200	682790	414430		3749600	2058700	1690900
PDC1	0.982101	1.31955	1.15083		133610	88452	45154		1971100	1026000	945170
PFK1	1.07446	0.591072	0.832768		36882	23817	13064		90825	65789	25036
PFK2	#N/A	#N/A	#N/A		26135	16258	9876.4		27395	17713	9681.8
PGK1	0.63966	#N/A	#N/A		73439	48167	25272		#N/A	#N/A	#N/A
PKH2	#N/A	#N/A	#N/A		#N/A	#N/A	#N/A		#N/A	#N/A	#N/A
PMA1	1.72967	1.8939	1.81179		1133200	585010	548180		701920	294560	407360
PNO1	2.66605	2.59438	2.63021		3256700	1362700	1894000		24531000	8530100	16001000
POL2	#N/A	#N/A	#N/A		#N/A	#N/A	#N/A		#N/A	#N/A	#N/A
POL5	#N/A	0.60545	#N/A		0	0	0		1172400	671380	501060
PRP43	0.953306	0.732013	0.84266		319710	204690	115020		5668200	3626500	2041700
PUF6	2.11082	1.20704	1.65893		307230	138900	168330		13680000	7358000	6322000
PWP1	0.678637	0.721567	0.700102		138450	99446	39006		3953300	2413500	1539800
PWP2	1	1	1		378650000	243920000	134730000		539490000	305380000	234110000
PXR1	0.474558	0.522479	0.498518		346430	270410	76015		1826700	933410	893310
RAD14	#N/A	#N/A	#N/A		#N/A	#N/A	#N/A		#N/A	#N/A	#N/A
RCL1	2.20637	2.43021	2.31829		8834100	3797200	5037000		31054000	11092000	19962000
REX4	#N/A	1.2506	#N/A		0	0	0		8684000	3773300	4910700
RFC1	#N/A	0.67994	#N/A		0	0	0		211860	133270	78587
RIX1	#N/A	#N/A	#N/A		0	0	0		#N/A	#N/A	#N/A
RLP24	5.40827	3.92857	4.66842		1036400	289360	747030		15282000	3598900	11683000
RLP7	#N/A	0.84005	#N/A		166120	123560	42560		12524000	6595400	5928400
ROK1	2.09275	2.29263	2.19269		1311800	599750	712000		24818000	9314300	15504000
RPA12	#N/A	#N/A	#N/A		251610	132870	118740		732800	332950	399850
RPA135	1.02472	1.07386	1.04929		323050	205290	117760		1829300	1002900	826390
RPA190	1.04014	1.21373	1.12694		483480	323810	159680		756080	388820	367260
RPA34	#N/A	#N/A	#N/A		108980	64475	44502		#N/A	#N/A	#N/A
RPA49	#N/A	0.91375	#N/A		0	0	0		1013100	522170	490970
RPB8	#N/A	0.80969	#N/A		#N/A	#N/A	#N/A		292610	141500	151110
RPC19	#N/A	#N/A	#N/A		117830	73753	44075		#N/A	#N/A	#N/A
RPF1	#N/A	0.82612	#N/A		0	0	0		1057800	522540	535300
RPF2	#N/A	2.5596	#N/A		263660	89927	173730		17110000	4897500	12212000
RPG1	#N/A	#N/A	#N/A		14972	8652.3	6319.7		#N/A	#N/A	#N/A
RPL10	0.820432	1.23641	1.02842		2370000	1089200	1280800		8800500	4513300	4287200
RPL11B	1.26593	2.36966	1.8178		1351000	796570	554380		15017000	5620100	9396700
RPL12B	1.1518	1.39085	1.27132		3324300	2041000	1283400		9108900	4536400	4572400
RPL13B	0.701099	0.852478	0.776788		2198500	1627000	571530		8955400	5535500	3419900
RPL14B	1.33801	2.14107	1.73954		309640	184970	124670		5070700	2415000	2655700
RPL15A	0.744068	0.793056	0.768562		570250	401680	168580		8678700	5500400	3178300
RPL15B	#N/A	#N/A	#N/A		0	0	0		#N/A	#N/A	#N/A
RPL16A	1.48821	2.10504	1.79663		399840	229990	169850		1715800	665350	1050400
RPL16B	1.06022	1.69828	1.37925		433880	281120	152760		6001000	2643500	3357500
RPL17A	0.46733	#N/A	#N/A		2436700	1662900	773830		#N/A	#N/A	#N/A
RPL18B	1.37739	2.20784	1.79262		1041000	570800	470230		19936000	7792600	12144000
RPL19B	0.937493	1.31768	1.12759		1358800	867280	491550		13565000	6890200	6674700
RPL1B	1.2623	1.82588	1.54409		798810	463950	334860		13585000	5880000	7705500
RPL20B	0.950214	1.74552	1.34787		2290200	1414400	875770		33596000	14675000	18921000
RPL21B	0.905886	1.6164	1.26114		636250	420270	215990		4046800	1761100	2285700
RPL23B	1.06035	2.39197	1.72616		762430	485280	277150		4067400	1322400	2745000
RPL24B	1.21246	1.30271	1.25758		3252000	1749100	1503000		6772200	3374900	3397300
RPL25	1.06571	2.06681	1.56626		3098500	1806900	1291600		18611000	7596400	11014000
RPL26B	0.771969	1.42244	1.0972		857180	570440	286740		2260600	1018300	1242300
RPL27A	0.5839	#N/A	#N/A		4724100	2868900	1855200		#N/A	#N/A	#N/A
RPL28	0.858056	1.37835	1.1182		1823700	1242300	581460		2329800	1179000	1150800
RPL2B	0.804749	1.36495	1.08485		1774800	1198600	576210		25565000	12243000	13321000
RPL3	1.25793	2.13622	1.69707		2353600	1376700	976870		22879000	8857600	14021000
RPL30	#N/A	1.3378	#N/A		371920	215340	156580		7203500	3262000	3941500
RPL31B	#N/A	#N/A	#N/A		464800	285550	179250		#N/A	#N/A	#N/A
RPL32	#N/A	1.6659	#N/A		397950	235760	162190		1075500	398140	677370
RPL33A	1.41868	2.0887	1.75369		2482400	1399900	1082500		12428000	4824600	7603800
RPL33B	0.45518	#N/A	#N/A		1752500	1223300	529180		2496000	878050	1618000
RPL34B	1.0398	2.05295	1.54638		2597800	1702500	895330		8786200	3036800	5749400
RPL35B	1.11646	1.2628	1.18963		1685700	1018200	667480		4036200	2057600	1978600
RPL36B	0.784839	0.799332	0.792086		1824500	1309200	515380		4585900	2916300	1669600
RPL37A	#N/A	#N/A	#N/A		0	0	0		179370	88898	90475
RPL37B	#N/A	#N/A	#N/A		197860	137620	60238		#N/A	#N/A	#N/A
RPL38	0.58195	#N/A	#N/A		1130100	649150	480920		#N/A	#N/A	#N/A
RPL42B	#N/A	#N/A	#N/A		#N/A	#N/A	#N/A		#N/A	#N/A	#N/A
RPL43B	1.23289	1.41689	1.32489		462240	305260	156980		6219800	3058900	3161000
RPL4A	1.33738	1.80399	1.57068		4391300	2598600	1792700		32494000	12335000	20159000
RPL4B	#N/A	1.5649	#N/A		0	0	0		504970	137730	367240
RPL5	1.39419	2.20106	1.79762		931340	552610	378730		32996000	12144000	20852000
RPL6A	1.03747	1.60878	1.32313		277650	190140	87512		1563900	737380	826500
RPL6B	1.25461	1.91302	1.58382		449210	240370	208840		7751100	3358900	4392200
RPL7A	#N/A	1.2679	#N/A		0	0	0		38063000	15085000	22978000
RPL7B	0.64699	#N/A	#N/A		1556000	902700	653290		#N/A	#N/A	#N/A
RPL8A	#N/A	0.64989	#N/A		0	0	0		1146100	654600	491490
RPL8B	0.882008	0.932861	0.907435		1158900	756970	401890		14376000	8425700	5950200
RPL9B	#N/A	#N/A	#N/A		83282	45878	37404		#N/A	#N/A	#N/A
RPP0	1.06836	1.16563	1.11699		963250	609470	353780		15998000	8758400	7239800
RPP1B	#N/A	#N/A	#N/A		1780100	1158000	622140		2277600	1145700	1131900
RPP2A	0.50785	#N/A	#N/A		1588700	1129000	459660		#N/A	#N/A	#N/A
RPS0B	#N/A	0.78255	#N/A		98924	63708	35215		2490800	1389400	1101400
RPS11B	1.38707	1.69246	1.53977		12288000	6850100	5437800		56515000	24721000	31794000
RPS12	2.60626	2.77892	2.69259		3198700	1278200	1920500		14026000	4562200	9463900
RPS13	1.02272	1.61169	1.31721		15792000	10117000	5675600		33411000	15334000	18078000
RPS14A	1.47584	1.59174	1.53379		5397000	3038300	2358600		46545000	21911000	24634000
RPS15	0.839058	1.54311	1.19108		2647400	1820300	827090		2562300	1191500	1370800
RPS16B	1.63097	2.32907	1.98002		3340500	1650000	1690500		22808000	8400400	14407000
RPS17B	0.735761	1.78376	1.25976		14366000	10418000	3948500		84954000	65903000	19051000
RPS18B	1.078	2.20355	1.64078		6661100	4053200	2607900		31511000	11634000	19878000
RPS19B	0.34475	#N/A	#N/A		1973300	1500300	473010		#N/A	#N/A	#N/A
RPS1A	0.726336	1.17928	0.952806		6814200	4909200	1905000		33035000	17186000	15849000
RPS1B	0.635835	1.04737	0.841602		1125000	819400	305550		1515900	852770	663100
RPS2	1.04926	1.73097	1.39012		1178500	712630	465880		12975000	5643100	7331900
RPS20	1.06698	1.79221	1.42959		1784400	1187700	596630		1068800	468950	599860
RPS22B	1.27018	2.42231	1.84625		2551100	1460200	1090900		46012000	16231000	29780000
RPS23B	1.42047	2.36856	1.89451		2958600	1693900	1264700		35225000	12711000	22513000
RPS24B	1.22524	2.35332	1.78928		7731900	4575600	3156300		37376000	13134000	24242000
RPS25B	0.724939	1.20974	0.967341		8212400	5247100	2965300		6195300	3154400	3040900
RPS26B	0.786161	1.65325	1.21971		8388800	6038800	2350100		4473200	2085400	2387800
RPS27B	0.414044	0.24104	0.327542		4547500	3713700	833810		5153900	4388700	765180
RPS28A	0.97381	#N/A	#N/A		#N/A	#N/A	#N/A		#N/A	#N/A	#N/A
RPS29A	0.40377	#N/A	#N/A		259970	171440	88535		#N/A	#N/A	#N/A
RPS3	0.895977	1.54325	1.21961		1474100	1012800	461350		10473000	4976900	5495900
RPS30B	#N/A	#N/A	#N/A		547580	372510	175060		#N/A	#N/A	#N/A
RPS31	0.661371	1.24028	0.950824		9858100	7446600	2411400		24460000	11780000	12679000
RPS4B	1.39048	1.54602	1.46825		4989200	2783300	2205900		61884000	28642000	33243000
RPS5	1.55634	1.89252	1.72443		5010600	2679400	2331200		69759000	30119000	39640000
RPS6B	1.14993	2.33198	1.74096		11682000	7198700	4483100		41868000	15810000	26058000
RPS7A	1.37074	2.44489	1.90782		466860	262180	204680		31159000	10580000	20579000
RPS7B	1.15703	1.48603	1.32153		1174500	723680	450800		4904500	2284000	2620500
RPS8B	1.63645	1.80219	1.71932		13682000	7208400	6473500		65801000	28446000	37355000
RPS9A	#N/A	#N/A	#N/A		176780	77914	98868		689920	219800	470110
RPS9B	1.78072	2.40929	2.09501		4217300	2114300	2103000		28419000	10106000	18314000
RRP1	#N/A	2.4569	#N/A		117320	32585	84730		7238900	2076000	5162900
RRP12	3.43602	3.04742	3.24172		5108200	1801200	3307000		57777000	19197000	38579000
RRP14	#N/A	#N/A	#N/A		0	0	0		#N/A	#N/A	#N/A
RRP15	#N/A	2.1171	#N/A		141490	82295	59191		4780100	1430600	3349400
RRP36	0.693053	0.586874	0.639964		415570	304890	110680		318070	222660	95407
RRP5	2.00875	2.02843	2.01859		8372600	4110400	4262200		56309000	22459000	33850000
RRP6	0.555541	0.256086	0.405813		472040	320230	151810		5453200	4579000	874230
RRP7	#N/A	1.9298	#N/A		71663	38306	33357		26734000	9246200	17488000
RRP8	#N/A	0.59793	#N/A		0	0	0		2263400	1356900	906530
RRP9	1.94114	1.48506	1.7131		47209000	23175000	24034000		51254000	24351000	26904000
RRS1	#N/A	2.2278	#N/A		123860	42290	81569		8946100	2859300	6086800
RRT14	2.32017	1.83128	2.07573		8090500	2718300	5372200		18396000	7735300	10661000
RSA3	#N/A	#N/A	#N/A		0	0	0		644010	451570	192440
SAS10	2.40715	1.6279	2.01752		28067000	12317000	15749000		33604000	14735000	18869000
SDA1	#N/A	#N/A	#N/A		0	0	0		#N/A	#N/A	#N/A
SGD1	0.973794	1.04331	1.00855		87047	55726	31320		4711900	2601500	2110400
SHM1	#N/A	#N/A	#N/A		0	0	0		#N/A	#N/A	#N/A
SMC3	#N/A	#N/A	#N/A		28860	11693	17167		#N/A	#N/A	#N/A
SNU13	1.25029	0.942809	1.09655		5779000	3505100	2273900		60002000	34601000	25401000
SNZ3	#N/A	#N/A	#N/A		#N/A	#N/A	#N/A		#N/A	#N/A	#N/A
SOF1	2.62302	1.87437	2.24869		8788700	3682400	5106300		49381000	21003000	28378000
SPB1	#N/A	#N/A	#N/A		0	0	0		197420	105030	92387
SPS4	#N/A	#N/A	#N/A		#N/A	#N/A	#N/A		#N/A	#N/A	#N/A
SRO9	0.68737	#N/A	#N/A		222320	139550	82768		131250	74607	56640
SRP40	0.556342	0.966084	0.761213		14650000	11211000	3438700		12679000	6983100	5695500
SSA2	1.11782	0.604622	0.861223		636430	394180	242250		3016500	1993300	1023200
SSB1	0.975955	1.04453	1.01024		667980	432150	235830		7114800	3909800	3205000
SSB2	#N/A	#N/A	#N/A		120720	71069	49653		186640	108690	77953
SSD1	#N/A	#N/A	#N/A		0	0	0		#N/A	#N/A	#N/A
SSF1	2.67499	3.08649	2.88074		569550	233830	335720		3127600	889230	2238400
SSF2	1.94301	3.50601	2.72451		58276	26962	31314		214190	58768	155430
STM1	#N/A	#N/A	#N/A		179040	111000	68037		#N/A	#N/A	#N/A
SUI3	#N/A	#N/A	#N/A		0	0	0		3166800	363430	2803400
SUP35	2.1708	0.375649	1.27322		254260	95198	159060		1131900	860390	271470
SWI1	#N/A	#N/A	#N/A		#N/A	#N/A	#N/A		#N/A	#N/A	#N/A
TAE2	#N/A	#N/A	#N/A		0	0	0		#N/A	#N/A	#N/A
TDH3	1.32034	1.62222	1.47128		2214400	1332200	882260		15041000	6513200	8527500
TEA1	#N/A	#N/A	#N/A		#N/A	#N/A	#N/A		#N/A	#N/A	#N/A
TEF2	1.08387	1.69883	1.39135		2154500	1324500	829960		3625100	1640800	1984300
TFC3	#N/A	#N/A	#N/A		#N/A	#N/A	#N/A		#N/A	#N/A	#N/A
TIF4631	#N/A	#N/A	#N/A		20395	13724	6670.9		#N/A	#N/A	#N/A
TIF4632	#N/A	#N/A	#N/A		0	0	0		#N/A	#N/A	#N/A
TMA23	0.58084	#N/A	#N/A		205020	133270	71750		174700	92685	82018
TPC1	#N/A	#N/A	#N/A		#N/A	#N/A	#N/A		#N/A	#N/A	#N/A
TRF5	0.814491	0.852686	0.833588		785800	523350	262450		4001000	2275800	1725300
UBP10	0.543546	0.643082	0.593314		46499	33731	12768		2015600	1340900	674730
URA2	1.14662	0.599953	0.873286		57568	37652	19916		34039	24178	9860.5
URB1	0.728255	0.654235	0.691245		7617.5	5414.5	2203		1944500	1327300	617270
URB2	#N/A	0.45816	#N/A		0	0	0		1334600	915970	418600
UTP10	1.46204	1.50723	1.48463		10853000	6008800	4844600		65831000	30486000	35345000
UTP11	1.96666	1.61931	1.79298		6360400	2990300	3370200		24411000	11099000	13312000
UTP13	1.00862	1.08148	1.04505		293550000	186320000	107230000		538500000	296930000	241570000
UTP14	2.62488	2.34708	2.48598		11683000	4947800	6734700		18814000	6766200	12048000
UTP15	1.78815	1.48187	1.63501		14341000	6934300	7406300		100600000	48261000	52341000
UTP18	1.08776	1.08153	1.08465		469490000	291070000	178420000		449770000	245950000	203820000
UTP20	3.84466	2.94421	3.39444		2397000	773010	1624000		33133000	10254000	22879000
UTP21	1.11956	1.15771	1.13863		261400000	160590000	100810000		495540000	265780000	229760000
UTP22	2.37139	2.57277	2.47208		6651500	2863000	3788500		43998000	15242000	28756000
UTP30	4.93909	3.84392	4.39151		500460	131760	368690		26872000	6779300	20093000
UTP4	1.73928	1.46649	1.60289		33022000	17001000	16021000		74283000	35411000	38872000
UTP5	1.7274	1.49074	1.60907		34668000	17783000	16885000		66199000	31641000	34558000
UTP6	0.945074	0.951025	0.948049		46778000	30639000	16140000		269540000	155980000	113560000
UTP7	2.37419	1.77448	2.07433		21097000	9203600	11893000		49920000	21729000	28191000
UTP8	1.48024	1.44516	1.4627		30530000	16436000	14094000		79466000	37917000	41550000
UTP9	1.47605	1.45541	1.46573		20800000	11417000	9383300		76801000	36153000	40648000
VMA2	#N/A	0.2366	#N/A		0	0	0		1416700	889500	527230
XRN1	#N/A	#N/A	#N/A		9036.8	4957.5	4079.3		228260	191110	37149
YBR284W	#N/A	#N/A	#N/A		#N/A	#N/A	#N/A		#N/A	#N/A	#N/A
YCR087C-A	#N/A	#N/A	#N/A		0	0	0		#N/A	#N/A	#N/A
YDJ1	#N/A	0.53445	#N/A		54147	34128	20019		1066200	674410	391790
YDR169C-A	#N/A	#N/A	#N/A		#N/A	#N/A	#N/A		#N/A	#N/A	#N/A
YDR261C-D	#N/A	#N/A	#N/A		20644	15251	5393.6		#N/A	#N/A	#N/A
YEF3	0.955131	1.31687	1.136		833770	542620	291160		291770	117900	173870
YGR026W	#N/A	#N/A	#N/A		#N/A	#N/A	#N/A		#N/A	#N/A	#N/A
YGR149W	#N/A	#N/A	#N/A		#N/A	#N/A	#N/A		#N/A	#N/A	#N/A
YPL150W	#N/A	#N/A	#N/A		#N/A	#N/A	#N/A		#N/A	#N/A	#N/A
YPL245W	#N/A	#N/A	#N/A		#N/A	#N/A	#N/A		#N/A	#N/A	#N/A
YRA1	1.1051	0.914906	1.01		510250	306930	203320		4845900	2778200	2067800
YTM1	#N/A	0.52002	#N/A		44613	32095	12518		10322000	6585200	3736800
ZDS2	#N/A	#N/A	#N/A		#N/A	#N/A	#N/A		#N/A	#N/A	#N/A
ACB1	#N/A	#N/A	#N/A		#N/A	#N/A	#N/A		#N/A	#N/A	#N/A
ARG81	#N/A	#N/A	#N/A		#N/A	#N/A	#N/A		370220	213150	157070
ATG2	#N/A	#N/A	#N/A		#N/A	#N/A	#N/A		#N/A	#N/A	#N/A
CAF4	#N/A	#N/A	#N/A		#N/A	#N/A	#N/A		#N/A	#N/A	#N/A
CCT6	#N/A	#N/A	#N/A		#N/A	#N/A	#N/A		77593	42789	34804
CKA1	#N/A	0.70131	#N/A		#N/A	#N/A	#N/A		623460	372970	250490
CKA2	#N/A	0.6771	#N/A		#N/A	#N/A	#N/A		1356600	825050	531600
CMK1	#N/A	#N/A	#N/A		#N/A	#N/A	#N/A		165240	86485	78753
CMS1	#N/A	0.4756	#N/A		#N/A	#N/A	#N/A		286830	185690	101140
CSL4	#N/A	0.16941	#N/A		#N/A	#N/A	#N/A		3543600	2932000	611610
DBP8	#N/A	0.49653	#N/A		#N/A	#N/A	#N/A		1411000	898160	512850
DIM1	#N/A	0.059627	#N/A		#N/A	#N/A	#N/A		1972300	1676500	295740
DNF1	#N/A	#N/A	#N/A		#N/A	#N/A	#N/A		34055	17324	16731
EDS1	#N/A	0.86568	#N/A		#N/A	#N/A	#N/A		#N/A	#N/A	#N/A
EFR3	#N/A	#N/A	#N/A		#N/A	#N/A	#N/A		51272	28542	22730
ERG20	#N/A	#N/A	#N/A		165650	76738	88915		#N/A	#N/A	#N/A
FYV7	#N/A	#N/A	#N/A		#N/A	#N/A	#N/A		1107100	284450	822640
KTR6	#N/A	#N/A	#N/A		#N/A	#N/A	#N/A		#N/A	#N/A	#N/A
LRP1	#N/A	0.22111	#N/A		#N/A	#N/A	#N/A		972160	808260	163900
LTV1	#N/A	#N/A	#N/A		#N/A	#N/A	#N/A		#N/A	#N/A	#N/A
MDJ1	#N/A	#N/A	#N/A		#N/A	#N/A	#N/A		106450	76099	30350
MDN1	#N/A	#N/A	#N/A		#N/A	#N/A	#N/A		#N/A	#N/A	#N/A
MRM1	#N/A	#N/A	#N/A		#N/A	#N/A	#N/A		135010	78116	56890
MTR3	#N/A	0.17248	#N/A		#N/A	#N/A	#N/A		1273000	1078600	194390
NDE1	#N/A	#N/A	#N/A		#N/A	#N/A	#N/A		#N/A	#N/A	#N/A
NEO1	#N/A	#N/A	#N/A		#N/A	#N/A	#N/A		#N/A	#N/A	#N/A
NHP6A	#N/A	#N/A	#N/A		#N/A	#N/A	#N/A		#N/A	#N/A	#N/A
NOG2	#N/A	0.63419	#N/A		0	0	0		289600	181440	108150
NSA2	#N/A	#N/A	#N/A		#N/A	#N/A	#N/A		371610	179680	191930
OPI6	#N/A	#N/A	#N/A		#N/A	#N/A	#N/A		3071400	1805000	1266500
PAT1	#N/A	#N/A	#N/A		#N/A	#N/A	#N/A		45283	31462	13822
PGC1	#N/A	#N/A	#N/A		#N/A	#N/A	#N/A		#N/A	#N/A	#N/A
PGS1	#N/A	#N/A	#N/A		#N/A	#N/A	#N/A		#N/A	#N/A	#N/A
PHO23	#N/A	#N/A	#N/A		#N/A	#N/A	#N/A		#N/A	#N/A	#N/A
POP1	#N/A	0.49017	#N/A		#N/A	#N/A	#N/A		792670	521560	271110
POP3	#N/A	0.54424	#N/A		#N/A	#N/A	#N/A		957560	645800	311760
POP4	#N/A	0.44252	#N/A		#N/A	#N/A	#N/A		328820	197210	131610
POP6	#N/A	0.50166	#N/A		#N/A	#N/A	#N/A		1853500	1163400	690160
PPZ1	#N/A	0.64977	#N/A		#N/A	#N/A	#N/A		46290	24325	21966
RAD5	#N/A	#N/A	#N/A		#N/A	#N/A	#N/A		#N/A	#N/A	#N/A
RFC5	#N/A	#N/A	#N/A		#N/A	#N/A	#N/A		266530	183210	83320
RIM15	#N/A	#N/A	#N/A		#N/A	#N/A	#N/A		#N/A	#N/A	#N/A
RKM4	#N/A	#N/A	#N/A		#N/A	#N/A	#N/A		#N/A	#N/A	#N/A
RMP1	#N/A	#N/A	#N/A		#N/A	#N/A	#N/A		98590	76129	22461
RPC40	#N/A	1.0394	#N/A		#N/A	#N/A	#N/A		430100	218410	211700
RPL17B	#N/A	1.0669	#N/A		#N/A	#N/A	#N/A		6597300	3211300	3386100
RPL22A	#N/A	0.97833	#N/A		#N/A	#N/A	#N/A		1866200	939600	926610
RPL27B	#N/A	1.432	#N/A		#N/A	#N/A	#N/A		41166000	16930000	24236000
RPL9A	#N/A	0.95803	#N/A		#N/A	#N/A	#N/A		2925400	1363600	1561700
RPP1	#N/A	0.5152	#N/A		#N/A	#N/A	#N/A		4554100	2948100	1606000
RPP1A	#N/A	#N/A	#N/A		#N/A	#N/A	#N/A		1694000	887000	806990
RPS10B	#N/A	#N/A	#N/A		#N/A	#N/A	#N/A		1301000	710890	590150
RPS28B	#N/A	1.1843	#N/A		1074600	531410	543230		9823400	5654900	4168500
RRP3	#N/A	0.56532	#N/A		0	0	0		3215300	2080500	1134800
RRP4	#N/A	0.16996	#N/A		#N/A	#N/A	#N/A		3235700	2699700	536010
RRP40	#N/A	0.15516	#N/A		#N/A	#N/A	#N/A		3108200	2532100	576080
RRP42	#N/A	0.1819	#N/A		#N/A	#N/A	#N/A		3624800	3054500	570330
RRP43	#N/A	#N/A	#N/A		#N/A	#N/A	#N/A		1991600	1676300	315350
RRP45	#N/A	0.18354	#N/A		#N/A	#N/A	#N/A		2938900	2396100	542830
RRP46	#N/A	0.17378	#N/A		#N/A	#N/A	#N/A		4244400	3538100	706370
SAM1	#N/A	#N/A	#N/A		#N/A	#N/A	#N/A		406820	351220	55597
SEH1	#N/A	#N/A	#N/A		#N/A	#N/A	#N/A		17537	8127.3	9409.8
SER3	#N/A	#N/A	#N/A		#N/A	#N/A	#N/A		#N/A	#N/A	#N/A
SKI6	#N/A	0.18371	#N/A		#N/A	#N/A	#N/A		1311700	1115900	195820
SLA2	#N/A	#N/A	#N/A		#N/A	#N/A	#N/A		#N/A	#N/A	#N/A
SLX9	#N/A	#N/A	#N/A		#N/A	#N/A	#N/A		742390	494500	247890
SMA2	#N/A	#N/A	#N/A		#N/A	#N/A	#N/A		466350	321680	144670
SMC1	#N/A	#N/A	#N/A		#N/A	#N/A	#N/A		#N/A	#N/A	#N/A
SNM1	#N/A	#N/A	#N/A		#N/A	#N/A	#N/A		1028300	642140	386160
SNQ2	#N/A	#N/A	#N/A		#N/A	#N/A	#N/A		#N/A	#N/A	#N/A
SSA1	#N/A	0.90862	#N/A		#N/A	#N/A	#N/A		212080	69909	142170
STP1	#N/A	#N/A	#N/A		#N/A	#N/A	#N/A		2169100	1085900	1083200
TEF4	#N/A	#N/A	#N/A		#N/A	#N/A	#N/A		125600	72237	53366
TIF6	#N/A	2.8393	#N/A		#N/A	#N/A	#N/A		5729700	1416300	4313400
TOM1	#N/A	#N/A	#N/A		#N/A	#N/A	#N/A		#N/A	#N/A	#N/A
TOR2	#N/A	#N/A	#N/A		#N/A	#N/A	#N/A		31755	20152	11602
TUB2	#N/A	#N/A	#N/A		#N/A	#N/A	#N/A		158330	89313	69013
UBP2	#N/A	#N/A	#N/A		#N/A	#N/A	#N/A		#N/A	#N/A	#N/A
UTP23	#N/A	0.42769	#N/A		#N/A	#N/A	#N/A		2534400	1717900	816450
UTP25	#N/A	0.63564	#N/A		#N/A	#N/A	#N/A		848720	529850	318870
YCP4	#N/A	#N/A	#N/A		#N/A	#N/A	#N/A		#N/A	#N/A	#N/A
YCR016W	#N/A	0.52557	#N/A		#N/A	#N/A	#N/A		1917100	1273000	644130
YEL057C	#N/A	#N/A	#N/A		#N/A	#N/A	#N/A		239140	131960	107180
YFH1	#N/A	#N/A	#N/A		#N/A	#N/A	#N/A		#N/A	#N/A	#N/A
YGR210C	#N/A	0.7244	#N/A		#N/A	#N/A	#N/A		1083500	609610	473930
YGR251W	#N/A	0.47114	#N/A		#N/A	#N/A	#N/A		801040	536040	265000
YGR283C	#N/A	0.60579	#N/A		#N/A	#N/A	#N/A		1205300	745690	459570
YHB1	#N/A	#N/A	#N/A		#N/A	#N/A	#N/A		372230	348740	23495
YIL002W-A	#N/A	#N/A	#N/A		#N/A	#N/A	#N/A		951940	524150	427790
YKL023W	#N/A	#N/A	#N/A		#N/A	#N/A	#N/A		84138	37689	46449
YMR310C	#N/A	0.59086	#N/A		#N/A	#N/A	#N/A		3296300	1976500	1319900
YNL050C	#N/A	0.29922	#N/A		#N/A	#N/A	#N/A		684800	507500	177310
YSA1	#N/A	#N/A	#N/A		#N/A	#N/A	#N/A		#N/A	#N/A	#N/A

## Sheet: 2. Rapamycin SILAC (Fig 3C,D,E)
	H/L normalized to the bait Pwp2				Experiment 1				Experiment 2
Name	Experiment 1	Experiment 2	Mean		iBAQ total	iBAQ L	iBAQ H		iBAQ total	iBAQ L	iBAQ H
ACT1	0.965199	0.330078	0.647638		66702	48472	18230		112380	57713	54663
ADH1	1.02232	0.557316	0.789817		267420	151000	116410		741570	315990	425580
AIR1	0.737726	0.49587	0.616798		3698000	2196200	1501800		5540900	2710400	2830600
AIR2	0	0	#N/A		#N/A	#N/A	#N/A		50886	20680	30206
ARX1	0	0	#N/A		41232	22206	19026		#N/A	#N/A	#N/A
ASC1	0.949209	0.524586	0.736897		2148500	1210000	938470		5420700	2490100	2930600
ASK10	0.835938	0	#N/A		#N/A	#N/A	#N/A		263710	174960	88750
ATG15	0	0	#N/A		#N/A	#N/A	#N/A		#N/A	#N/A	#N/A
AVO1	0	0	#N/A		#N/A	#N/A	#N/A		#N/A	#N/A	#N/A
BFR2	1.0513	0.582557	0.816931		4981300	2706400	2274900		8548100	3680000	4868100
BMS1	1.00838	0.696562	0.852471		3485400	1732300	1753100		8299900	3760100	4539800
BOI1	0.731313	0	#N/A		5406	3440.3	1965.7		59893	29585	30308
BRX1	0.714297	0.493145	0.603721		4596200	2634600	1961600		3543100	1910300	1632800
BUD21	0.839991	0.49401	0.667001		5264900	3122500	2142400		8068000	4038100	4029800
BUD22	0.782856	0.462902	0.622879		668380	385060	283320		1347500	615250	732210
YCL068C	0	0	#N/A		286300	286300	#N/A		#N/A	#N/A	#N/A
CBF5	0.670543	0.443463	0.557003		14337000	8799500	5537200		18339000	10021000	8317800
CCT8	0.776451	0	#N/A		#N/A	#N/A	#N/A		343600	181140	162460
CDC14	0.81575	0.54796	0.681855		2538600	1474400	1064100		1937900	962140	975810
CDC19	0.797195	0	#N/A		#N/A	#N/A	#N/A		123050	62148	60904
CDC48	0	0	#N/A		#N/A	#N/A	#N/A		35459	16074	19385
CIC1	0.547525	0.393953	0.470739		2176500	1342500	833940		1467100	939320	527790
CKA1	0.815271	0.457244	0.636258		247000	148180	98826		207620	88974	118640
CKA2	0	0.499322	#N/A		251660	170710	80946		#N/A	#N/A	#N/A
CKB1	0.74879	0.407734	0.578262		347320	225040	122280		955250	500860	454400
CKB2	0.822086	0.359579	0.590833		279700	180070	99623		742760	320500	422270
CMK1	1.10774	0	#N/A		71623	26182	45440		119700	57208	62491
CRT10	0	0	#N/A		#N/A	#N/A	#N/A		52491	30732	21759
CSL4	0.480205	0.558822	0.519514		882390	518780	363610		566870	345660	221210
CUL3	0	0	#N/A		#N/A	#N/A	#N/A		17791	8618.3	9172.7
DBP10	0.635682	0.439138	0.53741		367790	222760	145030		251640	141780	109860
DBP3	0.659436	0.468538	0.563987		504740	313120	191620		272730	161300	111430
DBP6	0.665635	0.472776	0.569206		401420	236490	164930		752650	407490	345160
DBP7	0.707755	0.525191	0.616473		793630	455700	337930		1545100	842970	702170
DBP8	0.794399	0.453921	0.62416		803010	473510	329500		1612600	842040	770590
DBP9	0.705609	0.506321	0.605965		2004700	1175500	829140		1675700	879720	795940
DED1	0.681009	0.506631	0.59382		101610	57325	44285		127200	71488	55709
DHR2	0.647584	0.448422	0.548003		2110900	1296800	814180		2391800	1308600	1083300
DIM1	0.472091	0.601254	0.536672		684570	394840	289720		148600	87858	60740
DIP2	1.10654	1.23108	1.16881		336170000	119290000	216870000		617200000	262280000	354930000
DIS3	0.534288	0.530943	0.532615		698670	372310	326360		376840	235220	141610
DOP1	0	0	#N/A		#N/A	#N/A	#N/A		#N/A	#N/A	#N/A
DRS1	0.809808	0.569129	0.689468		448630	252720	195910		387540	185390	202150
DYN1	0	0	#N/A		#N/A	#N/A	#N/A		#N/A	#N/A	#N/A
EBP2	0.736862	0.456552	0.596707		4216800	2508800	1708000		5131300	2728500	2402800
ECM16	0.709748	0.578168	0.643958		1372900	747930	625010		5296400	2804500	2491900
ECM32	0.949551	1.01636	0.982956		754390	310870	443530		1769000	803060	965940
ECM5	0	0.522639	#N/A		93338	55908	37430		82920	38531	44390
EFG1	0.725113	0.405053	0.565083		2478300	1505700	972670		1464900	807450	657410
EFR3	0.883454	0.560141	0.721798		63872	35704	28168		72631	39377	33254
EFT2	0.849098	0.350577	0.599837		351770	232740	119030		628030	305440	322590
EMG1	1.14271	0.814689	0.9787		7665900	3458600	4207300		14795000	6456400	8339000
ENO2	1.17187	0.525587	0.848728		832560	471050	361500		2203700	936350	1267400
ENP1	1.22753	1.10444	1.16599		6583000	2650100	3932900		12119000	4872400	7246500
ENP2	1.0277	0.572971	0.800338		4602600	2462200	2140400		17422000	7857900	9564100
ERB1	0.534391	0.459103	0.496747		1859600	1113200	746420		2346900	1383100	963850
ESF1	0.660453	0.356336	0.508394		4699100	3079900	1619200		6453100	3645500	2807500
ESF2	0.772082	0.467205	0.619643		8702200	5075400	3626800		12936000	6798000	6137800
FAF1	1.0832	0.567659	0.825428		721590	395250	326340		2305500	1026900	1278600
FAR10	0	0	#N/A		#N/A	#N/A	#N/A		16943	16943	#N/A
FAS2	0	0	#N/A		1412600	500580	912000		1964.8	991.29	973.54
FBA1	1.46943	0	#N/A		78630	38899	39731		168570	63644	104930
FCF1	1.01086	0.590068	0.800464		3947100	2062700	1884400		3322300	1494900	1827400
FCF2	0.852997	0.566153	0.709575		8192600	4581400	3611200		9916000	5503800	4412200
FCY21	0	0	#N/A		#N/A	#N/A	#N/A		1654900	707520	947350
FPR3	0.769953	0.594681	0.682317		9580400	5054100	4526300		20010000	10086000	9924000
FPR4	0.743668	0.650079	0.696874		5502100	2839000	2663100		7309000	3870800	3438200
FYV7	0	0.248796	#N/A		565170	406560	158610		#N/A	#N/A	#N/A
GAR1	0.725874	0.456271	0.591073		11123000	6348700	4773800		20640000	8768100	11872000
GCD11	0.776169	0.435412	0.60579		163570	103990	59586		1798000	821700	976300
GLC7	1.53134	0	#N/A		55126	35947	19179		103410	41640	61770
HAS1	0.740154	0.48033	0.610242		10143000	6048700	4093900		18282000	9459700	8822000
HCA4	0.494399	0.263969	0.379184		4308800	3100200	1208600		7643700	4762200	2881500
YEF3	0	0	#N/A		29410	16632	12778		83032	38773	44259
HHF2	1.08901	0.505377	0.797195		4399700	2151900	2247800		2842300	1115400	1726900
HHO1	1.00932	0.538345	0.773833		548510	280920	267590		194880	82002	112880
HHT2	0	0.49711	#N/A		1743300	963930	779400		488030	213050	274980
HMO1	0	0.600454	#N/A		519590	277100	242480		#N/A	#N/A	#N/A
HSC82	0.868491	0.497391	0.682941		86409	52490	33919		214050	103400	110650
HSP26	0	0.833141	#N/A		369120	176920	192200		49773	20514	29259
HTA2	0.811236	0.519677	0.665456		3478300	2070500	1407700		2621800	1589800	1032000
HTB2	0.897905	0.538021	0.717963		2426300	1409700	1016600		2143100	1054000	1089100
IMD2	0	0.536932	#N/A		79349	42158	37191		78880	44550	34330
IMD3	0.79186	0.485585	0.638722		1558600	923360	635280		3488800	1918200	1570600
IMD4	0.819282	0.496382	0.657832		4477900	2634600	1843300		8449000	4157400	4291600
IMP3	0.893715	0.453813	0.673764		6096100	3683300	2412700		2855900	1436600	1419200
IMP4	0.844951	0.477483	0.661217		13534000	7811700	5722800		9332400	4515400	4817100
JIP5	0.734844	0.517226	0.626035		331530	184660	146870		1497400	816200	681190
KRE33	1.22249	0.713659	0.968073		9070900	4503900	4567000		20441000	8412100	12029000
KRI1	0.66749	0.321313	0.494402		3679100	2500200	1179000		2258400	1420500	837950
KRR1	0.894656	0.44352	0.669088		7784800	4589100	3195700		4517600	2183900	2333700
LCP5	1.10971	0.592396	0.85105		5705300	3081500	2623800		7942700	3518300	4424400
LHP1	0	0	#N/A		#N/A	#N/A	#N/A		#N/A	#N/A	#N/A
LOC1	0.825182	0.627252	0.726217		3256800	1526100	1730800		1852000	1066400	785570
LRP1	0	0.627735	#N/A		639830	348240	291590		169300	69673	99627
LST8	0	0.559348	#N/A		115430	69715	45717		43726	30638	13087
MAK11	0.720522	0.736269	0.728395		331630	139500	192140		507630	275880	231750
MAK16	0.834664	0.605781	0.720222		1865700	992030	873720		2032400	1033800	998600
MAK21	0.761787	0.560581	0.661184		2849700	1630900	1218700		6469600	3528100	2941500
MAK5	0.739265	0.52243	0.630848		1917900	970910	947020		3635200	1967300	1667800
MIS1	0.695408	0.43028	0.562844		83746	53487	30259		190660	114900	75765
MLP2	0	0	#N/A		703430	680550	22882		1280600	1186500	94068
MPD1	0	0	#N/A		44281	29747	14534		#N/A	#N/A	#N/A
MPP10	0.853929	0.47558	0.664755		9379000	5651200	3727900		14378000	7235400	7142200
MRD1	0.301804	0.186644	0.244224		544420	400450	143970		486720	349980	136740
MRH4	0	0	#N/A		22937	13626	9310.5		#N/A	#N/A	#N/A
MRM1	0	0.5095	#N/A		72902	37452	35450		#N/A	#N/A	#N/A
MRPL17	0	0	#N/A		41307	24765	16541		38213	15828	22385
MRPL7	0	0	#N/A		12479	9536.6	2942.3		#N/A	#N/A	#N/A
MRT4	0.729149	0.461893	0.595521		3918400	2293800	1624600		3576100	1814800	1761300
MSS116	0.74242	0.439902	0.591161		1448800	877310	571530		5161900	3537300	1624500
MSS4	0	0	#N/A		#N/A	#N/A	#N/A		186710	88208	98498
MTR3	0	0.569209	#N/A		442700	251740	190960		114970	68134	46832
MTR4	0.68313	0.517861	0.600495		3067200	1720200	1347000		4441000	2475100	1965900
MYO2	0	0	#N/A		#N/A	#N/A	#N/A		29191	18854	10337
NAN1	1.00128	0.697794	0.849539		18583000	9311400	9271400		49513000	23352000	26160000
NET1	0.757854	0.535909	0.646881		1220400	696560	523840		669270	339930	329340
NHP2	0.730449	0.412664	0.571556		17639000	10858000	6780800		7565200	4147600	3417600
NIP1	0	0	#N/A		11376	3864.9	7511.3		8777.5	3329.8	5447.7
NIP7	0.806875	0.61745	0.712162		1800600	986550	814060		2036100	1010600	1025600
NOB1	0.972381	0.58539	0.778886		69043	45708	23335		1216100	547020	669080
NOC2	0.746387	0.56221	0.654299		3044900	1694800	1350100		5676800	3035300	2641500
NOC3	0.695716	0.673007	0.684362		123080	67376	55707		271540	146280	125260
NOC4	1.11116	0.824708	0.967933		3500300	1609400	1890900		6899300	2947300	3952000
NOG1	0.809277	0.642713	0.725995		871480	450080	421400		809350	389970	419380
NOG2	0.720385	0.484813	0.602599		638520	385150	253360		269820	137720	132100
NOP1	0.765883	0.443174	0.604529		60997000	37116000	23880000		78619000	40865000	37754000
NOP10	0	0	#N/A		#N/A	#N/A	#N/A		229670	138510	91163
NOP12	0.699786	0.45751	0.578648		6468900	3901100	2567700		7646400	4019700	3626700
NOP13	0.663437	0.417075	0.540256		4216200	2535700	1680500		4832600	2617800	2214800
NOP14	1.12048	0.77447	0.947475		6336500	2961600	3374900		11490000	4822000	6667700
NOP15	0.534015	0.425832	0.479924		1398600	838400	560180		545300	318560	226740
NOP16	0.624267	0.489758	0.557012		1118500	578150	540340		629440	325560	303880
NOP2	0.794758	0.594767	0.694763		3272800	1737700	1535100		5902900	2933100	2969800
NOP4	0.62478	0.514279	0.569529		1580500	909970	670500		1968800	1120800	847990
NOP53	0.877383	0.994955	0.936169		412460	171050	241410		797890	384770	413120
NOP56	0.707798	0.404887	0.556343		35456000	22038000	13418000		48878000	25022000	23856000
NOP58	0.697717	0.400822	0.549269		21152000	13742000	7409700		36147000	19805000	16342000
NOP6	0.398854	0.234684	0.316769		3894900	2855200	1039700		911790	606750	305040
NOP7	0.567559	0.477152	0.522355		1605400	922170	683280		1832800	1086900	745960
NOP8	0.615314	0.471969	0.543642		1235300	731910	503340		1747500	972640	774910
NOP9	0.5882	0.356235	0.472217		1161700	771450	390200		316290	179410	136880
NPL3	0	0	#N/A		34366	21459	12908		52224	28466	23759
NPR3	0	0	#N/A		#N/A	#N/A	#N/A		#N/A	#N/A	#N/A
NSA1	0.994784	0.669036	0.83191		454660	236970	217690		369800	181530	188260
NSR1	0.656665	0.427901	0.542283		9030700	5606100	3424600		3818800	2178300	1640500
NUG1	0.641257	0.513832	0.577544		198320	111220	87105		498350	270730	227620
NUM1	0	0	#N/A		#N/A	#N/A	#N/A		12889	12889	#N/A
PAB1	0.822933	0.556054	0.689494		2800800	1595100	1205700		3243100	1609800	1633300
PAP2	0	0	#N/A		#N/A	#N/A	#N/A		5773.2	2935	2838.1
PAT1	0	0	#N/A		#N/A	#N/A	#N/A		2262.2	1059.8	1202.4
PDC1	0.89628	0.416419	0.65635		494730	274910	219820		854780	411950	442840
PFK2	0	0	#N/A		#N/A	#N/A	#N/A		25655	15349	10306
PNO1	1.0932	0.833502	0.963352		2460000	1171600	1288400		8630600	3701500	4929100
POL5	0.776469	0.487805	0.632137		1215100	699310	515750		12026000	6192600	5833500
POP1	0.585421	0	#N/A		#N/A	#N/A	#N/A		174970	104580	70384
PPZ1	0.871227	0.58392	0.727573		50135	29910	20225		247660	124450	123200
PRP43	0.679239	0.441862	0.560551		1399500	845530	554010		623760	312230	311520
PUF6	0.768217	0.524679	0.646448		3634000	2110500	1523600		7393500	3968700	3424900
PWP1	0.741317	0.390255	0.565786		2015200	1284100	731070		1824100	938670	885390
PWP2	1	1	1		226640000	92637000	134010000		526930000	238130000	288800000
PXR1	0.698666	0.516052	0.607359		681500	246310	435190		223180	130150	93033
RCL1	1.02266	0.698234	0.860447		5249000	2678000	2571000		11690000	5364700	6324900
RDH54	0.661368	0	#N/A		#N/A	#N/A	#N/A		26282	14584	11698
MRPL28	0	0	#N/A
PCL10	1.10628	1.23512	1.1707
TID3	0	0	#N/A
UMP1	0	0	#N/A
YMR185W	1.05327	1.12664	1.08996
REX4	0.614057	0.475811	0.544934		1757700	1032800	724880		860300	504040	356260
RFC1	0.831501	0.478146	0.654823		211090	117010	94082		315860	163650	152210
RFC2	0	0.464689	#N/A		118700	79746	38957		53939	26708	27232
RFC3	0.713741	0.503842	0.608791		373940	221180	152760		176210	96091	80116
RFC4	0	0	#N/A		39460	21137	18323		#N/A	#N/A	#N/A
RFC5	0	0	#N/A		39894	23996	15898		#N/A	#N/A	#N/A
RGC1	0	0	#N/A		#N/A	#N/A	#N/A		17531	7291.9	10239
RIF1	0	0	#N/A		6310.3	6132.4	177.91		#N/A	#N/A	#N/A
RKR1	0	0	#N/A		#N/A	#N/A	#N/A		3067	1231.9	1835.1
RLI1	1.17674	0	#N/A		65382	40553	24828		238030	107450	130580
RLP24	0.695306	0.565698	0.630502		3421100	1818300	1602800		1342700	687910	654810
RLP7	0.568303	0.450764	0.509533		3674400	2247600	1426800		1178200	705310	472870
ROK1	0.935015	0.547751	0.741383		4712600	2687600	2025000		13049000	6234700	6814800
RPA12	1.83018	0	#N/A		889550	276430	613120		924710	425440	499270
RPA135	0.769944	0.596173	0.683059		1355700	730580	625150		1615400	834080	781280
RPA190	0.786165	0.609608	0.697886		539210	285350	253860		774310	396810	377500
RPA34	0	0.65449	#N/A		839960	444680	395280		87299	51644	35656
RPA43	0	0.548674	#N/A		475240	265900	209340		26693	11829	14865
RPA49	0.747422	0.612945	0.680184		1957300	1053300	903950		742320	413050	329270
RPB5	0	0.640298	#N/A		353810	199670	154140		#N/A	#N/A	#N/A
RPB8	0.810517	0	#N/A		69750	31694	38056		358750	178220	180530
RPC19	0	0	#N/A		226910	133150	93761		#N/A	#N/A	#N/A
RPC37	0	0	#N/A		12871	#N/A	12871		#N/A	#N/A	#N/A
RPC40	0.795152	0.641387	0.718269		816010	432920	383090		833660	390080	443580
RPF1	0.834536	0.568625	0.70158		493920	258620	235300		545150	278180	266970
RPF2	0.847627	0.76892	0.808274		1644500	800150	844360		7269000	3854100	3414900
RPL10	0.937922	0.41461	0.676266		9628700	5960100	3668600		11458000	5038100	6419400
RPL11B	0.911757	0.44672	0.679239		8455300	5119300	3336000		7774400	3788100	3986300
RPL12B	0.838281	0.404606	0.621444		11262000	6711600	4550600		9895000	5105500	4789500
RPL13B	0.853048	0.346302	0.599675		18336000	12480000	5855800		11739000	5845600	5893500
RPL14A	0.991706	0.378499	0.685103		2678800	1676300	1002500		3993200	1943500	2049700
RPL15B	0.841129	0.369403	0.605266		26639000	19441000	7197100		28273000	19906000	8366500
RPL16A	0.939803	0.367032	0.653418		1377100	881730	495410		1379100	631130	747950
RPL16B	0.893801	0.381346	0.637574		5993100	3805600	2187400		4590200	2207400	2382800
RPL17A	0.995041	0.416498	0.70577		15475000	9697300	5777300		18484000	9885700	8598700
RPL18B	0.969902	0.430006	0.699954		23420000	14725000	8695200		16053000	7425000	8627800
RPL19B	0.960923	0.379177	0.67005		26431000	17148000	9283200		12223000	5729000	6494200
RPL1B	0.805019	0.396411	0.600715		15198000	9646800	5551300		14375000	7324700	7050200
RPL20B	0.955879	0.404793	0.680336		25798000	16424000	9374700		21578000	10192000	11386000
RPL21A	1.01548	0.447117	0.731297		9364500	5680300	3684200		8082100	3665700	4416400
RPL21B	0	0.414473	#N/A		267140	169490	97659		#N/A	#N/A	#N/A
RPL22A	0.946986	0	#N/A		654000	388320	265680		1716400	840250	876150
RPL23B	1.16417	0.544428	0.854301		1624800	941690	683060		694570	291240	403330
RPL24A	0.965028	0.4373	0.701164		7241600	4358900	2882800		6828400	3115100	3713300
RPL24B	0.984096	0	#N/A		196970	127670	69300		633840	273320	360520
RPL25	0.910817	0.366145	0.638481		22119000	14456000	7663100		19074000	9055200	10019000
RPL26A	0.917657	0.386658	0.652158		6317000	3985200	2331800		5114500	2505900	2608500
RPL26B	0	0	#N/A		#N/A	#N/A	#N/A		156100	81217	74881
RPL27B	0.914835	0.3833	0.649068		36784000	24015000	12770000		37886000	18127000	19759000
RPL28	0.882086	0.363572	0.622829		5009300	3262300	1746900		3073400	1513800	1559600
RPL2B	0.942198	0.368192	0.655195		30855000	20095000	10760000		35316000	16471000	18846000
RPL3	0.882514	0.378204	0.630359		15195000	9824700	5370300		19389000	9218800	10170000
RPL30	0.830979	0.390298	0.610639		3339600	2173300	1166200		8651500	4248800	4402800
RPL31B	0	0.565965	#N/A		739380	363780	375600		111790	52175	59610
RPL32	0.827234	0.439109	0.633171		1669700	969240	700500		936380	439660	496720
RPL33A	0.978623	0.379854	0.679239		12002000	7708600	4293100		13539000	6331100	7207400
RPL33B	0	0	#N/A		2119000	1212800	906190		2210000	1015000	1195100
RPL34B	0.902266	0.512008	0.707137		10659000	6650300	4008700		6775600	3270300	3505300
RPL35B	0.898504	0.431901	0.665203		4447900	2828500	1619400		2422600	1059700	1362900
RPL36A	0	0	#N/A		42845	30487	12358		#N/A	#N/A	#N/A
RPL36B	0.858743	0.348804	0.603773		11879000	7924300	3954900		3784300	1892100	1892200
RPL37A	0	0	#N/A		253000	157280	95723		402290	177610	224680
RPL37B	0	0	#N/A		#N/A	#N/A	#N/A		143640	75853	67784
RPL38	0	0	#N/A		1577800	921970	655840		1412900	626010	786890
RPL42B	0	0.436904	#N/A		774290	494360	279930		265900	108540	157360
RPL43B	1.02668	0.389289	0.707984		10591000	6681700	3909000		14332000	6248300	8084100
RPL4A	0.884652	0.387336	0.635994		20864000	13405000	7458800		32676000	15866000	16810000
RPL4B	0.921163	0.361266	0.641214		764050	510720	253330		745980	360020	385970
RPL5	0.852133	0.479739	0.665936		10312000	6090000	4222500		31249000	15275000	15975000
RPL6A	0.92578	0.354901	0.640341		1918500	1344600	573910		1898800	925260	973580
RPL6B	0.943908	0.38583	0.664869		7328100	4742400	2585700		12622000	5616600	7005800
RPL7A	0.927234	0.41634	0.671787		16034000	10097000	5936200		56231000	25845000	30386000
RPL8A	0.806721	0.349056	0.577888		1326700	859940	466760		738840	369840	369000
RPL8B	0.861821	0.371457	0.616639		12652000	8358100	4294000		11328000	5626600	5701400
RPL9A	0.950321	0.458649	0.704485		3491500	2034200	1457300		4455200	2125500	2329700
RPL9B	0	0	#N/A		159240	93263	65974		141280	69735	71542
RPO31	0	0.902263	#N/A		211580	91382	120200		69793	30246	39546
RPP0	0.8164	0.426611	0.621506		13335000	8363700	4971200		16828000	8602300	8225600
RPP1	0	0	#N/A		46991	31599	15393		80170	56208	23961
RPP1A	0	0	#N/A		226260	170690	55568		#N/A	#N/A	#N/A
RPP1B	0	0	#N/A		2493900	1509400	984510		2085100	996480	1088600
RPP2A	0	0.459082	#N/A		1374700	851470	523240		425020	218360	206660
RPS0B	0.874391	0.502818	0.688604		2616000	1565500	1050600		1566200	732730	833450
RPS10B	0.811543	0.475047	0.643295		1001300	611690	389610		1251400	599890	651550
RPS11B	0.918256	0.398184	0.65822		30183000	19142000	11041000		25057000	11796000	13261000
RPS12	1.06473	0.585383	0.825056		1743200	943370	799840		3011900	1386100	1625800
RPS13	0.917572	0.440421	0.678996		13630000	8436600	5193700		9917100	5016900	4900200
RPS14B	0.869004	0.456855	0.662929		17262000	10450000	6811900		15645000	7560100	8084500
RPS15	0.94767	0.383869	0.66577		4256500	2713400	1543200		3935800	1919600	2016100
RPS16B	0.995468	0.464005	0.729736		7969300	4687100	3282200		11649000	5359700	6289300
RPS17B	0.987858	0.412808	0.700333		51795000	43755000	8040100		14975000	6948800	8026000
RPS18B	0.99162	0.458505	0.725063		11192000	6842600	4349800		11462000	5168300	6293800
RPS19B	0.872595	0.331923	0.602259		1232100	821480	410660		258350	114540	143810
RPS1A	0.888072	0.419619	0.653846		2373400	1467900	905470		2555500	1206500	1349000
RPS1B	0.892604	0.40302	0.647812		15383000	9698500	5684100		15319000	7419200	7899400
RPS2	0.949979	0.406833	0.678406		7382300	4694900	2687400		13459000	6185300	7273700
RPS20	0.966225	0.488554	0.72739		6152800	4818400	1334400		10527000	7899200	2628000
RPS22B	0.999829	0.531988	0.765908		5802200	3181900	2620300		12440000	5699900	6740500
RPS23B	1.02762	0.548003	0.787811		5388300	3003600	2384700		7730300	3156100	4574300
RPS24B	1.02163	0.427598	0.724616		26242000	16422000	9819400		21514000	9770300	11744000
RPS25B	0.837272	0.378795	0.608034		9306900	6301900	3005000		6960800	3739400	3221500
RPS26B	0.994699	0.496245	0.745472		4224800	2511700	1713100		2075500	916240	1159300
RPS27B	0.710483	0.48694	0.598711		4764100	2806100	1958100		4674500	2518400	2156200
RPS28B	0.832655	0.418351	0.625503		2689600	1649200	1040400		1813900	895110	918750
RPS29A	1.10227	0	#N/A		94060	50472	43588		480980	236720	244260
RPS3	0.917486	0.472892	0.695189		4445500	2717300	1728200		7805600	3798600	4007000
RPS31	0.933818	0.503957	0.718887		6807600	3804300	3003200		8164100	3921300	4242800
RPS4B	0.877469	0.386471	0.63197		26226000	16814000	9412500		32570000	15907000	16663000
RPS5	0.883112	0.425645	0.654379		10876000	6983100	3892400		26435000	13689000	12746000
RPS6B	1.04831	0.456588	0.75245		27461000	16712000	10749000		28508000	12742000	15765000
RPS7A	1.082	0.57274	0.827371		4537500	2500800	2036800		7031700	3020700	4011000
RPS7B	0.817435	0.405305	0.61137		1044500	695450	349090		823520	430060	393450
RPS8B	0.90714	0.416037	0.661588		33468000	20999000	12469000		36467000	17444000	19022000
RPS9A	0.963232	0.404613	0.683923		8129400	5114500	3014900		8434300	3873900	4560400
RPS9B	0	0	#N/A		1173100	721580	451570		1293900	612830	681060
RPT6	0	0	#N/A		#N/A	#N/A	#N/A		14990	4757.2	10233
RRP1	0.717512	0.515388	0.61645		726020	419770	306250		719970	340930	379040
RRP12	1.0277	0.767623	0.897664		5991600	2872000	3119500		17981000	7934500	10047000
RRP14	0.884053	0.540846	0.71245		725640	402370	323270		460850	211550	249310
RRP15	0.748123	0.531728	0.639926		1484900	730830	754030		542420	271080	271340
RRP17	0	0	#N/A		107500	58497	49007		149980	69923	80060
RRP3	0.791578	0.556977	0.674277		221310	113850	107460		1314400	588340	726030
RRP36	0	0.383516	#N/A		119230	78944	40286		98404	59519	38885
RRP4	0.566823	0.565972	0.566398		424580	244000	180580		403770	238340	165440
RRP40	0.480034	0.582305	0.53117		544990	272050	272950		528530	356680	171850
RRP42	0.472048	0.645906	0.558977		655930	385970	269960		476570	283510	193050
RRP43	0.558375	0.602025	0.5802		432650	244610	188040		214300	130380	83920
RRP45	0.564139	0.548904	0.556521		643880	361180	282700		182070	113350	68727
RRP46	0	0.575883	#N/A		750420	401830	348590		170940	96031	74913
RRP5	0.92578	0.553705	0.739743		6427900	3597600	2830300		23754000	11867000	11887000
RRP6	0.529508	0.577606	0.553557		1557500	837520	719960		319340	189960	129380
RRP7	0.973407	0.535649	0.754528		4459400	2516100	1943300		3546100	1600500	1945600
RRP8	0.703018	0.446742	0.57488		1539700	1021700	517980		1466100	777140	688910
RRP9	0.858914	0.473238	0.666076		7065300	4236500	2828900		18842000	9268700	9572800
RRS1	0.794707	0.710358	0.752532		942770	494460	448310		952590	495820	456770
RRT14	0.932877	0.606054	0.769466		1178300	641280	537060		3663800	1842600	1821300
RSA3	0	0	#N/A		203800	128400	75393		358000	190440	167570
RTT101	0.782121	0	#N/A		#N/A	#N/A	#N/A		21421	11865	9556.2
SAC7	0.815879	0.430662	0.62327		49182	26165	23016		150940	79047	71894
SAS10	0.857717	0.52052	0.689119		7643200	4362700	3280500		7868800	3912500	3956400
SBP1	0.85451	0	#N/A		#N/A	#N/A	#N/A		117740	61881	55855
SEH1	0	0	#N/A		#N/A	#N/A	#N/A		14962	6412.5	8549.7
SEN1	0	0.384568	#N/A		38120	23909	14211		15300	12410	2890.1
SGD1	0.899188	0.542749	0.720968		890960	505660	385300		4135300	2421000	1714300
SHM1	0.846652	0	#N/A		36996	20061	16935		335170	167380	167800
SIR2	0.695237	0.408015	0.551626		103130	66143	36991		83018	41123	41896
SKI6	0	0.534597	#N/A		661910	345320	316590		#N/A	#N/A	#N/A
SNU13	0.700941	0.421306	0.561123		6280500	3906800	2373700		16891000	9148100	7743000
SOF1	0.904233	0.470607	0.68742		7630000	4568900	3061100		15756000	7589700	8166000
SOK1	0	0	#N/A		#N/A	#N/A	#N/A		#N/A	#N/A	#N/A
SPB1	0.802437	0	#N/A		#N/A	#N/A	#N/A		68579	28940	39640
SRO9	0.785242	0.399308	0.592275		514800	323400	191400		185250	87860	97392
SRP40	0.706216	0.460667	0.583442		3315000	1956100	1358900		4433100	2398600	2034400
SSA1	1.2649	0	#N/A		58295	48560	9734.7		193480	78639	114840
SSA2	0.785686	0.415136	0.600411		961840	606720	355120		2127700	1059700	1068000
SSB1	0	0	#N/A		130230	76288	53946		177490	88130	89361
SSB2	0.876528	0.500627	0.688578		2091200	1213100	878110		4653400	2308700	2344800
SSC1	0.867037	0	#N/A		#N/A	#N/A	#N/A		39128	19909	19219
SSD1	0	0	#N/A		93460	25597	67863		#N/A	#N/A	#N/A
SSF1	0.732518	0.561475	0.646996		1111900	615020	496850		1395600	782860	612740
SSF2	0.852039	0	#N/A		41963	16900	25062		150140	78067	72072
STM1	0.766541	0	#N/A		#N/A	#N/A	#N/A		216830	90697	126130
STT4	0.957247	0	#N/A		2452.3	1473.6	978.76		24258	12070	12188
SUI3	0.726721	0.447189	0.586955		212720	123010	89711		203330	113860	89470
SUP35	0.58454	0.335714	0.460127		739760	451190	288570		1226600	735640	490920
TAE2	0	0	#N/A		6580	4163.1	2416.9		12273	6809.8	5463.4
TDH2	1.12356	0.435685	0.779621		181250	109570	71688		206750	92839	113910
TDH3	1.11509	0.453474	0.784283		4606200	2805800	1800300		11543000	5321500	6221300
TEF2	0.91133	0.449222	0.680276		2258900	1396900	861930		2956300	1374300	1582000
THR4	0	0	#N/A		#N/A	#N/A	#N/A		#N/A	#N/A	#N/A
TIF4632	0	0	#N/A		17087	12670	4416.9		#N/A	#N/A	#N/A
TIF6	0.643412	0.681462	0.662437		997560	499420	498140		1984100	1210900	773230
TMA23	0	0	#N/A		143840	81546	62292		102180	51243	50935
TOF2	0	0	#N/A		14043	9508.8	4534.4		#N/A	#N/A	#N/A
TOR2	0.769731	0.469958	0.619844		10173	6127	4045.8		14205	7393.9	6811
TRF5	0.781137	0.502357	0.641747		3260600	1933600	1327000		9474700	4925200	4549500
TRM44	0	0	#N/A		#N/A	#N/A	#N/A		#N/A	#N/A	#N/A
TSC11	0	0	#N/A		#N/A	#N/A	#N/A		#N/A	#N/A	#N/A
TUB2	0.901154	0	#N/A		51433	22090	29342		307810	164530	143270
UBP10	0.550406	0.385174	0.46779		1048800	655060	393690		935850	532540	403310
URA2	0	0	#N/A		4741.2	1721.9	3019.2		#N/A	#N/A	#N/A
URB1	0.637426	0.493837	0.565632		494170	288670	205500		401280	217510	183760
URB2	0.702856	0.51541	0.609133		291220	178130	113090		197640	103550	94086
UTP10	0.997862	0.706883	0.852373		15070000	7334600	7735100		32722000	14939000	17783000
UTP11	0.84572	0.483314	0.664517		8709600	5088600	3621000		4757000	2192500	2564400
UTP13	1.09158	1.2434	1.16749		279650000	103000000	176650000		723870000	329710000	394160000
UTP14	1.01855	0.735476	0.877016		3030600	1458000	1572700		5053600	2277800	2775800
UTP15	0.986062	0.695445	0.840754		29657000	14758000	14899000		50714000	23493000	27220000
UTP18	1.06464	1.14545	1.10505		340100000	125580000	214520000		823790000	351100000	472690000
UTP20	1.37289	0.708534	1.04071		2459000	1205900	1253100		3841100	1485400	2355800
UTP21	1.10073	1.19382	1.14727		236710000	87033000	149680000		643090000	275320000	367780000
UTP22	0.968534	0.581966	0.77525		4228000	2287200	1940900		13929000	6262400	7666700
UTP23	0.644523	0.367371	0.505947		2458300	1485000	973270		1131100	600260	530860
UTP25	0.863018	0.475984	0.669501		107230	57945	49286		1341100	646830	694250
UTP30	1.22907	1.08455	1.15681		3153900	1293500	1860400		8983100	3782400	5200700
UTP4	0.941855	0.623353	0.782604		12362000	6568400	5793100		41423000	20565000	20858000
UTP5	1.0118	0.682204	0.847002		9309200	4740200	4569000		30636000	13797000	16839000
UTP6	1.05643	1.0857	1.07107		275040000	106440000	168600000		233590000	101540000	132050000
UTP7	0.85245	0.462239	0.657344		8956400	5354000	3602400		18159000	8769600	9389400
UTP8	1.01796	0.728845	0.873401		12623000	6235800	6387100		39724000	17569000	22156000
UTP9	0.984096	0.689203	0.836649		10029000	4906400	5122600		32468000	14761000	17707000
VMA2	0.559461	0.392706	0.476084		287800	170390	117410		611050	327940	283120
XRN1	0.985977	0.520398	0.753187		118620	75792	42827		239970	114990	124980
YCR016W	0.6813	0.434525	0.557912		1155200	699160	456040		942190	558990	383190
YCR087C-A	0.910731	0.471198	0.690965		745230	479050	266180		210090	113560	96523
YDJ1	0.72726	0.509413	0.618336		510440	293120	217320		1196400	596890	599490
YPR137C-B	0.669269	0.618783	0.644026		17466	9414.4	8051.8		109000	64095	44908
YDR333C	0	0	#N/A		#N/A	#N/A	#N/A		#N/A	#N/A	#N/A
YDR514C	0	0.558909	#N/A		46690	27285	19405		#N/A	#N/A	#N/A
YEL020C	0	0	#N/A		#N/A	#N/A	#N/A		109590	45474	64115
YGR210C	0.753416	0.467248	0.610332		1200800	691400	509380		2904900	1512800	1392100
YGR251W	0	0.427692	#N/A		414760	273690	141070		110600	71696	38904
YGR283C	0.546533	0.433912	0.490223		727960	485920	242040		293470	168710	124750
YHR127W	0.886618	0	#N/A		174710	87082	87633		240680	120090	120580
YIL161W	0	0	#N/A		58424	38259	20165		#N/A	#N/A	#N/A
YKL023W	0	0.623396	#N/A		363340	187360	175980		105140	41977	63158
YMR124W	0	0	#N/A		26845	#N/A	26845		#N/A	#N/A	#N/A
YMR310C	0.570004	0.406653	0.488329		1144800	714800	429970		489330	306330	183000
YNL050C	0.397674	0.306062	0.351868		415180	279660	135520		227840	162600	65246
YOR131C	0	0	#N/A		241920	16959	224960		144680	50157	94522
YPL150W	0	0	#N/A		#N/A	#N/A	#N/A		#N/A	#N/A	#N/A
YRA1	0.950235	0.552667	0.751451		7528100	4013100	3515000		2971600	1522000	1449600
YTM1	0.574519	0.477678	0.526098		1717600	1011300	706350		3261100	2038000	1223100

## Sheet: 3. TBB SILAC (Fig 6C)
	H/L normalized to the bait Pwp2				Experiment 1				Experiment 2
Name	Experiment 1	Experiment 2	Average		iBAQ total	iBAQ L	iBAQ H		iBAQ total	iBAQ L	iBAQ H
ABM1	#N/A	#N/A	#N/A		0	0	0		0	0	0
ACS2	4.68075	3.63992	4.16033		209860	82963	126900		150660	61017	89646
ADH1	5.41144	4.88156	5.1465		3660500	1297400	2363100		2031500	702660	1328800
AGP3	#N/A	#N/A	#N/A		0	0	0		0	0	0
AIR1	0.730404	0.163505	0.446954		2595700	1984300	611390		2373900	2204500	169390
ALD6	#N/A	1.82303	#N/A		66919	29257	37661		74688	41575	33113
ARB1	#N/A	#N/A	#N/A		0	0	0		31102	7207.1	23895
ARC1	20.8483	13.7399	17.2941		671950	74166	597780		274170	107130	167040
ARP4	#N/A	#N/A	#N/A		0	0	0		42479	4236.4	38242
ARX1	5.13715	3.02413	4.08064		123300	47993	75303		45187	19780	25408
ASC1	2.41873	1.41161	1.91517		2509600	1334300	1175300		1380200	837820	542430
ASF1	#N/A	#N/A	#N/A		0	0	0		99180	65561	33619
ASI3	#N/A	#N/A	#N/A		54618	52870	1747.7		0	0	0
ASK10	1.04086	#N/A	#N/A		33424	24449	8975		23525	23525	0
ATC1	#N/A	#N/A	#N/A		0	0	0		0	0	0
BFR2	6.17238	1.26366	3.71802		14564000	4567300	9996600		8541000	5520300	3020700
BMS1	8.42241	2.00619	5.2143		26863000	6596700	20267000		12778000	6803900	5973800
BRF1	#N/A	#N/A	#N/A		50627	31671	18956		0	0	0
BRX1	2.36642	1.0546	1.71051		4441800	2220200	2221600		855640	570050	285580
BUD21	5.18861	1.3966	3.2926		12112000	4125200	7986300		11402000	7202200	4199700
BUD22	4.43134	1.70611	3.06873		3970100	1438500	2531600		1541700	774080	767620
CBF5	1.85757	0.886991	1.37228		21495000	12787000	8708500		16952000	12367000	4585400
CCT8	2.3719	1.21427	1.79309		129110	72800	56312		197900	126000	71899
CDC14	2.87722	0.694442	1.78583		193470	89603	103870		66736	51628	15108
CDC19	3.04293	1.43663	2.23978		1296100	601610	694520		1592800	980400	612390
CDC48	2.22104	0.816739	1.51889		465860	248330	217520		102200	78598	23600
CDC53	#N/A	#N/A	#N/A		19354	2473.9	16880		0	0	0
CDC6	#N/A	#N/A	#N/A		187200	105210	81990		0	0	0
CIC1	2.80542	1.3217	2.06356		3459100	1693700	1765400		1855400	1144300	711110
CKA1	2.73982	#N/A	#N/A		222870	101680	121190		0	0	0
CKA2	2.74796	#N/A	#N/A		117500	53850	63654		0	0	0
CKB1	#N/A	1.8708	#N/A		281380	140620	140770		303330	168680	134650
CKB2	2.29027	2.01968	2.15497		326950	178840	148100		129590	71459	58129
CMC1	#N/A	#N/A	#N/A		0	0	0		0	0	0
CMK1	#N/A	#N/A	#N/A		63876	52916	10960		0	0	0
CMS1	#N/A	1.60883	#N/A		181890	91859	90031		790250	481080	309170
CRT10	#N/A	#N/A	#N/A		0	0	0		9362.6	8957	405.57
CSL4	1.8885	0.256413	1.07246		1838400	1142200	696140		714250	631970	82283
CYK3	#N/A	#N/A	#N/A		0	0	0		27037	0	27037
CYR1	#N/A	#N/A	#N/A		75116	33737	41379		42431	30882	11548
DAL2	#N/A	#N/A	#N/A		0	0	0		47635	24763	22871
DBP10	2.17826	2.50835	2.34331		475410	245540	229870		53293	27964	25328
DBP2	2.03099	2.20872	2.11986		1149400	689870	459490		189740	94644	95101
DBP3	1.91703	1.35949	1.63826		440370	252720	187650		132030	79683	52352
DBP6	2.00693	1.17793	1.59243		1340100	791960	548140		524340	336200	188140
DBP7	2.38222	1.32561	1.85392		1179400	615890	563490		258580	148850	109720
DBP8	2.03159	0.720906	1.37625		4131300	2426100	1705200		698080	513720	184360
DBP9	2.76168	0.88505	1.82336		2228500	1109000	1119500		481600	329910	151700
DED1	3.92546	1.33229	2.62888		1589000	684940	904010		376230	235660	140570
DFG5	#N/A	#N/A	#N/A		0	0	0		41311	25696	15616
DHR2	1.76538	0.41176	1.08857		1776600	1085900	690710		1595400	1309100	286340
DIM1	3.65796	0.773983	2.21597		7168900	5747100	1421900		201570	145540	56028
DIP2	1.18674	1.76904	1.47789		533990000	370240000	163750000		244240000	139390000	104850000
DIS3	1.86611	0.281797	1.07395		2113400	1211600	901820		1939700	1681400	258260
DNF3	#N/A	#N/A	#N/A		52180	43318	8862		0	0	0
DOG2	#N/A	#N/A	#N/A		0	0	0		0	0	0
DRS1	2.26227	0.631757	1.44701		1153000	621170	531800		196770	109860	86906
DYN1	#N/A	#N/A	#N/A		81281	58629	22652		0	0	0
EBP2	2.54612	1.07824	1.81218		4412300	2351200	2061000		2891600	1992700	898990
ECM16	2.93123	0.743095	1.83716		9788100	4758700	5029400		4710800	3571700	1139100
EDC3	#N/A	#N/A	#N/A		0	0	0		26860	21816	5043.7
EFG1	2.34586	1.02914	1.6875		3417500	1817400	1600200		878870	612690	266180
EFR3	#N/A	#N/A	#N/A		0	0	0		0	0	0
EFT2	5.58195	2.38272	3.98233		1206000	406560	799410		1050300	518620	531710
EMG1	10.8642	2.39967	6.63191		40407000	8221000	32186000		9239900	4656100	4583900
ENO2	3.44757	1.63122	2.5394		317420	129430	187990		716010	423880	292130
ENP1	13.4442	2.06519	7.75469		28746000	4967800	23778000		8744300	4764700	3979600
ENP2	5.92891	1.22614	3.57753		21047000	6696900	14351000		13111000	8487500	4623100
ERB1	2.95272	0.673653	1.81319		5610100	2692800	2917200		2017100	1550200	466960
ESF1	5.53048	1.26121	3.39584		11248000	3723600	7524000		6916300	4511800	2404600
ESF2	3.28045	1.46118	2.37082		8423600	4025400	4398100		4614700	2827700	1787100
ESP1	1.0188	#N/A	#N/A		340950	236140	104820		53266	25206	28061
FAF1	4.00238	0.880848	2.44161		2240200	911090	1329100		658070	476220	181850
FAR1	#N/A	#N/A	#N/A		61250	43877	17373		0	0	0
FAR11	#N/A	#N/A	#N/A		0	0	0		189180	106840	82334
FAS1	4.88887	#N/A	#N/A		37681	17122	20559		3543.1	2301.4	1241.7
FAS2	#N/A	2.22629	#N/A		17487	11276	6211.1		14080	7746.9	6333.2
FBA1	3.74703	2.14987	2.94845		214220	100870	113350		230580	121360	109220
FCF1	5.64133	1.09392	3.36762		7154700	2331800	4822900		1633200	1128200	505010
FCF2	5.92071	1.71646	3.81858		11916000	3894300	8021300		8637700	5010600	3627100
FPR3	1.57293	0.899007	1.23597		11364000	6416000	4948000		4730300	3546500	1183800
FPR4	1.74576	0.809048	1.2774		9274500	5713100	3561400		1197900	886180	311690
FRT1	#N/A	#N/A	#N/A		0	0	0		15468	8997.8	6469.8
FUN12	#N/A	4.54467	#N/A		0	0	0		14357	4696.3	9661.2
FYV7	2.21926	#N/A	#N/A		648360	325230	323120		490900	68091	422810
GAR1	1.92625	0.859274	1.39276		5823000	3519500	2303500		9362100	6887800	2474300
GCD11	3.64665	1.71651	2.68158		465760	203180	262580		145360	84043	61315
GDH1	#N/A	1.38913	#N/A		0	0	0		29192	20049	9143
GRR1	#N/A	#N/A	#N/A		0	0	0		110110	67033	43077
GUS1	25.6538	12.7568	19.2053		628780	40340	588440		325290	39816	285470
HAS1	2.41551	0.715377	1.56544		21768000	11742000	10026000		11987000	9128900	2858000
HCA4	3.86806	1.26162	2.56484		21896000	9567200	12329000		12159000	7921500	4237500
HHF2	#N/A	0.94481	#N/A		1189800	262130	927630		100160	73572	26589
HHT2	#N/A	#N/A	#N/A		360950	196230	164720		0	0	0
HLR1	#N/A	#N/A	#N/A		0	0	0		14883	14883	0
HSC82	3.92716	2.19641	3.06178		758370	321100	437270		514230	263030	251200
HSP60	#N/A	2.32957	#N/A		0	0	0		56187	26190	29997
HTA2	#N/A	#N/A	#N/A		466050	258550	207500		139190	106480	32707
HTB2	1.97707	1.23371	1.60539		1125500	626940	498570		321040	210580	110460
ILV1	#N/A	#N/A	#N/A		0	0	0		9819.7	9202.4	617.26
IMD3	2.93943	2.17002	2.55472		5619400	2686100	2933300		2167500	1107200	1060300
IMD4	2.95215	2.11608	2.53412		15672000	7700000	7972500		5670000	3035300	2634700
IML2	#N/A	#N/A	#N/A		148230	115180	33059		0	0	0
IMP3	5.26411	1.2344	3.24925		9672900	3370000	6302900		1027500	668950	358570
IMP4	5.54179	1.28836	3.41508		20350000	6980600	13370000		6016300	4077800	1938500
IRC20	#N/A	#N/A	#N/A		23821	12930	10892		43928	23757	20171
IRC5	#N/A	#N/A	#N/A		0	0	0		0	0	0
JIP5	2.48931	1.63655	2.06293		370380	180640	189750		170050	92772	77277
JSN1	#N/A	#N/A	#N/A		187500	133160	54341		0	0	0
KAP123	11.795	10.9256	11.3603		228240	36636	191610		92959	14763	78196
KRE33	3.38649	0.862001	2.12425		24978000	11154000	13824000		11634000	8431100	3203300
KRI1	1.18213	0.603941	0.893038		3614000	2449300	1164700		2622400	2110100	512310
KRR1	7.26586	1.89171	4.57879		11310000	3286100	8023400		2171400	1203700	967760
LCP5	5.93344	1.16427	3.54885		14902000	4577500	10324000		6140800	4075800	2065000
LDH1	#N/A	#N/A	#N/A		139130	100170	38960		0	0	0
LEU1	#N/A	#N/A	#N/A		0	0	0		9813.8	2018.6	7795.2
LHP1	#N/A	1.34401	#N/A		0	0	0		107750	67201	40548
LOC1	2.80107	#N/A	#N/A		2058300	859810	1198500		156670	94516	62151
LRP1	1.8352	#N/A	#N/A		502750	303080	199680		0	0	0
LYS5	#N/A	#N/A	#N/A		415530	224710	190820		114320	51318	63005
MAK11	3.14331	1.09308	2.11819		1054100	484720	569420		405000	273110	131890
MAK16	3.0039	0.898098	1.951		2399000	1110300	1288700		884760	637040	247720
MAK21	2.42837	1.17459	1.80148		7090100	3834900	3255200		3172400	2041500	1130900
MAK5	1.60624	0.27273	0.939484		2614400	1619500	994930		849580	689710	159860
MCR1	#N/A	#N/A	#N/A		116170	8432.8	107740		0	0	0
MED4	#N/A	#N/A	#N/A		295560	204770	90790		0	0	0
MGA1	#N/A	#N/A	#N/A		151980	101660	50327		0	0	0
MIS1	2.53583	1.61758	2.0767		329990	197430	132560		210980	126560	84423
MLH1	1.63618	#N/A	#N/A		336410	228340	108070		94523	57996	36527
MLH3	#N/A	#N/A	#N/A		0	0	0		30634	16169	14464
MLP2	#N/A	#N/A	#N/A		0	0	0		2296900	2153800	143050
MMT2	#N/A	#N/A	#N/A		0	0	0		0	0	0
MPP10	5.41483	1.3118	3.36331		24703000	8737100	15966000		21502000	13949000	7552900
MRD1	1.50625	0.594776	1.05051		1813900	1146300	667650		1936900	1489000	447970
MRT4	2.59889	1.93719	2.26804		3918600	1848200	2070300		1443000	795930	647100
MSH2	#N/A	#N/A	#N/A		0	0	0		0	0	0
MSS116	2.77341	1.38596	2.07969		1815700	856260	959470		942370	565950	376420
MTC7	#N/A	#N/A	#N/A		0	0	0		0	0	0
MTG2	#N/A	#N/A	#N/A		0	0	0		0	0	0
MTR3	1.95289	0.284426	1.11866		765820	448680	317140		622820	495270	127550
MTR4	1.92962	0.680509	1.30506		3979900	2344700	1635200		3324200	2521100	803140
NAN1	4.74352	1.3909	3.06721		46610000	17196000	29414000		36958000	23452000	13506000
NCP1	#N/A	#N/A	#N/A		164950	117150	47801		0	0	0
NCS2	#N/A	#N/A	#N/A		66112	23258	42855		0	0	0
NEM1	#N/A	#N/A	#N/A		0	0	0		28411	28411	0
NET1	1.4584	#N/A	#N/A		5842.1	3465.3	2376.8		8269.2	7718.9	550.31
NEW1	#N/A	#N/A	#N/A		0	0	0		0	0	0
NHP2	1.78984	0.905912	1.34788		18731000	11529000	7201800		23177000	16130000	7046700
NIP1	#N/A	#N/A	#N/A		0	0	0		8206.1	3606.2	4599.9
NIP7	3.25783	1.97191	2.61487		1527100	667630	859420		727440	343840	383590
NMA1	#N/A	1.62203	#N/A		167650	92752	74896		116350	66513	49839
NMD2	#N/A	#N/A	#N/A		0	0	0		0	0	0
NOB1	3.26264	2.37842	2.82053		296290	142690	153600		51164	24655	26510
NOC2	2.4299	1.13274	1.78132		6040600	3199300	2841200		3014200	2023000	991240
NOC3	1.44837	#N/A	#N/A		120320	75101	45221		0	0	0
NOC4	10.1581	2.21479	6.18643		13051000	2954400	10097000		5052000	2653000	2398900
NOG1	1.91064	1.12407	1.51735		1090900	631410	459520		138830	96784	42045
NOG2	#N/A	0.804207	#N/A		0	0	0		46093	35782	10311
NOP1	3.48716	1.01039	2.24878		130310000	56857000	73453000		107160000	74959000	32200000
NOP12	2.28566	1.43751	1.86159		7808500	4211200	3597300		4333900	2675600	1658300
NOP13	1.81125	1.36281	1.58703		2134400	1253300	881040		1132900	706500	426430
NOP14	9.86851	2.09785	5.98318		30959000	6956200	24003000		15856000	8316600	7539900
NOP15	2.52098	1.18262	1.8518		2737100	1334200	1402800		1118800	672010	446780
NOP16	2.97167	1.0374	2.00453		1548100	795540	752520		487450	354480	132970
NOP2	3.09128	1.72329	2.40728		5489100	2542900	2946200		1444100	832460	611610
NOP4	2.42481	0.921565	1.67319		3362800	1790600	1572200		1354800	986380	368410
NOP53	2.77056	#N/A	#N/A		194770	92614	102150		0	0	0
NOP56	3.62572	0.950757	2.28824		70443000	30120000	40323000		55297000	39289000	16008000
NOP58	3.59546	0.966778	2.28112		60852000	26533000	34318000		45436000	32292000	13144000
NOP6	1.40323	0.904978	1.15411		2493600	1595200	898390		1373300	929600	443720
NOP7	2.77746	0.666699	1.72208		5005800	2431400	2574500		1663800	1278000	385780
NOP8	1.5975	0.99624	1.29687		1979900	1206200	773740		868840	601570	267280
NOP9	1.26776	0.462306	0.865032		1614400	1092000	522490		1202800	966740	236090
NPL3	2.30497	1.57153	1.93825		165500	81741	83760		220320	123460	96861
NPR2	#N/A	#N/A	#N/A		0	0	0		0	0	0
NPR3	#N/A	#N/A	#N/A		0	0	0		0	0	0
NSA1	3.07516	1.50774	2.29145		405680	187520	218160		66550	41591	24959
NSR1	1.99511	1.21678	1.60594		29075000	16934000	12141000		8852200	5816700	3035500
NUG1	1.87369	1.09758	1.48563		434070	249650	184420		197140	131930	65213
OLA1	#N/A	9.37635	#N/A		128920	29908	99011		130330	23287	107040
OSH6	#N/A	#N/A	#N/A		0	0	0		63072	40107	22965
OXP1	6.51142	#N/A	#N/A		37863	10465	27398		0	0	0
PAB1	2.91059	1.76789	2.33924		4376300	2109300	2266900		1476400	820750	655660
PAM16	#N/A	#N/A	#N/A		219350	219350	0		0	0	0
PAN1	#N/A	#N/A	#N/A		0	0	0		14994	14994	0
PCL6	#N/A	#N/A	#N/A		0	0	0		27879	21235	6644.4
PDC1	3.31722	2.23926	2.77824		646790	297190	349600		814080	406820	407260
PDR16	#N/A	#N/A	#N/A		0	0	0		149720	90099	59625
PEP8	#N/A	#N/A	#N/A		0	0	0		0	0	0
PET127	#N/A	#N/A	#N/A		29031	29031	0		0	0	0
PEX15	#N/A	#N/A	#N/A		0	0	0		41087000	25872000	15215000
PFK1	6.45317	1.78487	4.11902		300860	86491	214370		134840	71240	63598
PFK2	#N/A	1.37203	#N/A		0	0	0		78778	46219	32559
PGK1	6.06945	2.54374	4.30659		95052	30781	64272		142100	68994	73102
PMA1	2.32889	1.4109	1.8699		127760	68239	59525		79230	47793	31436
PNO1	9.05808	1.79806	5.42807		17581000	4392400	13189000		9261800	5292100	3969700
POL5	0.656317	0.513785	0.585051		1047000	790130	256880		40433	33794	6639.3
POP1	#N/A	#N/A	#N/A		24085	13858	10227		9330.4	5206.7	4123.7
PPZ1	#N/A	1.74049	#N/A		0	0	0		50199	32103	18096
PRP39	#N/A	#N/A	#N/A		0	0	0		0	0	0
PRP43	1.93762	1.21449	1.57606		691770	398480	293290		499360	301680	197680
PRT1	#N/A	4.07608	#N/A		0	0	0		44108	8099.9	36008
PSP2	#N/A	#N/A	#N/A		0	0	0		0	0	0
PSY2	#N/A	#N/A	#N/A		43690	31466	12224		0	0	0
PUF6	2.2463	1.12706	1.68668		5542200	3027300	2514900		1853300	1232800	620550
PWP1	1.89535	2.05708	1.97621		598870	356020	242860		1097600	570940	526700
PWP2	1	1	1		625730000	453760000	171970000		287090000	201280000	85810000
PXR1	1.99463	0.827379	1.411		372920	206080	166840		726410	456690	269720
RAD54	#N/A	#N/A	#N/A		0	0	0		86279	54050	32229
RAT1	#N/A	#N/A	#N/A		142340	105880	36455		0	0	0
RCL1	8.58783	2.04224	5.31503		23212000	5758900	17453000		11529000	6202400	5326500
REX4	1.92122	#N/A	#N/A		1523400	917180	606240		42184	32776	9407.7
RFC1	1.92359	1.18353	1.55356		137530	74090	63439		37559	26114	11444
RFC3	#N/A	#N/A	#N/A		90210	54520	35690		0	0	0
RGC1	#N/A	#N/A	#N/A		0	0	0		13217	13217	0
RIM15	#N/A	#N/A	#N/A		20901	16251	4650.1		0	0	0
RLI1	#N/A	1.57015	#N/A		66130	30414	35716		128390	82858	45536
RLP24	2.49975	1.27873	1.88924		1588300	812310	775970		388510	257400	131110
RLP7	2.63633	0.885836	1.76108		4426900	2173100	2253800		990490	722540	267950
RNA1	#N/A	#N/A	#N/A		0	0	0		28818	8282	20536
ROK1	12.8809	3.15928	8.02009		19615000	3582800	16032000		14667000	6355000	8311700
RPA12	#N/A	#N/A	#N/A		970750	540380	430370		148600	84148	64449
RPA135	2.42608	1.51324	1.96966		3472600	1814600	1658000		554270	335560	218710
RPA190	2.48948	1.60691	2.0482		2024500	1038900	985590		340750	210430	130320
RPA43	2.07281	#N/A	#N/A		842750	435830	406920		49226	30120	19106
RPA49	2.15386	1.54079	1.84732		2403000	1432800	970120		193800	113700	80101
RPB5	#N/A	#N/A	#N/A		269230	144220	125010		0	0	0
RPB8	#N/A	#N/A	#N/A		0	0	0		51781	29273	22509
RPC40	2.35482	1.54755	1.95119		1169900	587510	582420		113310	62711	50603
RPF1	1.10878	#N/A	#N/A		215450	151040	64408		0	0	0
RPF2	2.81679	1.53516	2.17598		3717100	1945800	1771300		2709100	1692600	1016500
RPG1	#N/A	#N/A	#N/A		0	0	0		8292.7	5043.7	3249
RPL10	2.6842	1.63576	2.15998		4334000	2118400	2215600		742860	434910	307950
RPL11B	2.51015	1.42378	1.96696		9768300	5138700	4629600		3426200	2143800	1282400
RPL12B	2.20461	1.16586	1.68524		5131100	2997700	2133400		548150	349060	199080
RPL13B	2.24355	1.12743	1.68549		9093700	5007700	4086000		1083700	683280	400430
RPL14B	2.43318	1.32047	1.87683		812850	420230	392620		152550	93764	58785
RPL15B	2.21273	1.13682	1.67477		11949000	6553800	5395300		1292800	857840	435000
RPL16A	1.83825	1.2127	1.52548		997290	575780	421510		117520	77145	40376
RPL16B	1.82395	1.02917	1.42656		2210400	1358300	852040		351630	242060	109580
RPL17A	2.2623	1.23975	1.75103		5783200	3257300	2525900		769440	494730	274700
RPL18B	2.2159	1.13729	1.67659		12882000	7238600	5642900		2121600	1425900	695710
RPL19B	2.363	1.13193	1.74746		9312200	4968300	4344000		1192400	788130	404260
RPL1B	2.11761	1.23218	1.6749		7978400	4782900	3195500		1894200	1249400	644820
RPL20B	2.02011	1.06077	1.54044		13525000	7641300	5883500		1675500	1139500	535940
RPL21A	2.35347	1.07996	1.71671		5452200	2737500	2714700		602640	400730	201910
RPL23B	2.9646	1.38053	2.17256		625950	267300	358650		280300	159800	120500
RPL24A	2.59142	1.23145	1.91143		4129300	2294200	1835100		2121100	1376800	744270
RPL24B	#N/A	#N/A	#N/A		1107600	803690	303930		0	0	0
RPL25	2.19803	1.17557	1.6868		10263000	5704800	4558000		3293600	2184900	1108800
RPL26B	2.2923	#N/A	#N/A		2580600	1422300	1158200		189560	119430	70126
RPL27B	2.05803	1.00882	1.53342		16870000	9487600	7382000		5766500	3975000	1791400
RPL28	2.28857	1.19828	1.74342		1888400	978700	909700		400890	255690	145190
RPL2B	2.08076	1.05723	1.56899		15418000	8897400	6521000		8751700	6216400	2535400
RPL3	2.38313	1.09507	1.7391		11963000	6491100	5472300		7015400	4765800	2249700
RPL30	2.33124	1.03551	1.68337		2827700	1513300	1314400		747770	508170	239600
RPL32	3.96335	#N/A	#N/A		1573500	580180	993320		0	0	0
RPL33A	2.33076	1.14753	1.73915		8480300	5642700	2837500		1705000	1155700	549310
RPL33B	#N/A	#N/A	#N/A		1509100	652290	856810		326370	220150	106220
RPL34B	#N/A	1.2871	#N/A		1928500	1084500	844010		1342900	807660	535240
RPL35B	2.64775	#N/A	#N/A		2057200	1019900	1037300		0	0	0
RPL36B	2.14147	1.21953	1.6805		5143700	2958200	2185500		864480	560360	304130
RPL37A	#N/A	1.40083	#N/A		0	0	0		171860	105810	66056
RPL37B	#N/A	#N/A	#N/A		0	0	0		36120	21466	14654
RPL38	#N/A	#N/A	#N/A		0	0	0		227300	118450	108850
RPL43B	1.80935	1.29462	1.55199		3629800	1954100	1675800		3576900	1411100	2165800
RPL4A	2.46236	1.08276	1.77256		15276000	7999800	7276600		8181500	5679600	2501900
RPL4B	#N/A	#N/A	#N/A		337220	181150	156070		88756	62201	26555
RPL5	2.54841	1.54627	2.04734		10976000	5453000	5523100		3273400	2074400	1199100
RPL6A	2.08398	#N/A	#N/A		840260	475110	365150		55612	46790	8821.6
RPL6B	2.20541	1.32834	1.76687		3194600	1711500	1483100		331460	223890	107580
RPL7A	2.29315	1.07534	1.68425		12291000	6594100	5696600		4055500	2745200	1310300
RPL8A	1.95159	#N/A	#N/A		303680	156080	147600		58226	36229	21997
RPL8B	2.24955	1.21196	1.73075		6749500	3764700	2984800		1115700	732970	382700
RPL9A	2.48646	1.38301	1.93473		1866000	969650	896400		1478700	946920	531740
RPN1	5.1247	#N/A	#N/A		49608	17453	32155		21530	10244	11286
RPN2	1.34264	#N/A	#N/A		127730	74344	53385		6172.7	2913.8	3259
RPP0	2.27949	1.34954	1.81452		7566000	4115200	3450700		4237300	2722000	1515400
RPP1B	#N/A	#N/A	#N/A		1441600	714520	727120		541880	330090	211790
RPP2A	2.34052	#N/A	#N/A		709320	382830	326490		0	0	0
RPP2B	#N/A	#N/A	#N/A		0	0	0		130670	88111	42555
RPS0B	2.59066	#N/A	#N/A		1122800	589830	532950		58164	38180	19984
RPS11B	3.73996	1.06104	2.4005		33859000	14197000	19662000		10033000	6972400	3060400
RPS12	5.66932	1.63643	3.65288		5258900	1721600	3537300		1339400	795470	543960
RPS13	4.2105	1.44103	2.82576		11617000	4724100	6893000		1276100	775020	501090
RPS14A	5.17645	1.44914	3.31279		32081000	11550000	20531000		7291900	4463500	2828400
RPS15	2.23377	#N/A	#N/A		2073100	1101800	971300		495560	330440	165120
RPS16B	6.64348	1.75764	4.20056		11797000	3130000	8667100		2561500	1473900	1087600
RPS17B	2.60005	1.07345	1.83675		19414000	9865900	9547900		1509500	1043200	466360
RPS18B	2.27305	0.830106	1.55158		14181000	7759700	6421300		2395700	1773600	622060
RPS1A	2.40668	0.980784	1.69373		2602800	1387400	1215400		752460	532930	219530
RPS1B	2.50042	1.0143	1.75736		15079000	7809100	7269900		5376200	3792500	1583700
RPS2	2.54883	1.20046	1.87465		4460500	2382700	2077800		3839300	2648600	1190700
RPS20	2.23631	1.3536	1.79496		16313000	15354000	959540		650150	424030	226120
RPS22B	3.08591	1.11679	2.10135		5307300	2590600	2716600		2880700	1940600	940090
RPS23B	4.25574	0.968179	2.61196		6473300	2490200	3983100		1836100	1305200	530890
RPS24B	2.62699	1.02467	1.82583		14930000	7778600	7151900		3597500	2569700	1027800
RPS25B	2.62886	#N/A	#N/A		1937100	1027300	909810		319150	172770	146380
RPS26B	#N/A	1.41021	#N/A		755350	383720	371640		448770	290280	158490
RPS27B	2.8089	0.840033	1.82447		8645800	4493200	4152700		3991100	3033700	957430
RPS28B	#N/A	#N/A	#N/A		941810	494690	447120		0	0	0
RPS3	2.48651	1.16166	1.82409		4792900	2480500	2312400		3172700	2118900	1053800
RPS31	4.06572	1.60537	2.83554		58380000	23625000	34755000		9064200	5344100	3720100
RPS4B	2.54816	0.954566	1.75136		23257000	12083000	11175000		6633700	4665100	1968700
RPS5	4.25348	1.39444	2.82396		20455000	8805600	11650000		13494000	8564300	4930000
RPS6B	2.84272	0.962748	1.90273		22539000	10796000	11742000		6033800	4138800	1895000
RPS7A	2.46041	0.79396	1.62719		7821200	4039800	3781400		1791800	1323200	468600
RPS7B	1.90847	0.861141	1.3848		1585800	916950	668880		220340	156600	63743
RPS8B	4.46641	1.06775	2.76708		46517000	17711000	28806000		9919800	6865900	3053900
RPS9A	2.23244	0.966237	1.59934		13403000	7301600	6101000		1684000	1181600	502370
RPS9B	#N/A	#N/A	#N/A		1301700	699060	602660		334540	238350	96190
RPT1	#N/A	#N/A	#N/A		0	0	0		22925	11256	11669
RPT4	#N/A	#N/A	#N/A		52724	15912	36812		33534	20142	13391
RPT5	#N/A	#N/A	#N/A		56199	19877	36323		17878	9719.9	8158.5
RRP1	2.7336	0.554059	1.64383		1454200	704350	749810		949830	753820	196000
RRP12	8.42552	1.58212	5.00382		35118000	11974000	23145000		12421000	7412000	5009300
RRP14	2.04349	#N/A	#N/A		140760	70092	70670		55627	38322	17304
RRP15	2.58376	#N/A	#N/A		1191100	626100	564970		161720	109370	52344
RRP3	1.9137	0.575413	1.24456		1295600	764750	530840		499290	384300	114990
RRP36	3.29827	1.51032	2.40429		889380	407880	481500		1549300	903600	645700
RRP4	1.67071	0.365122	1.01792		1739600	1112800	626770		1604600	1344400	260150
RRP40	2.05562	0.240463	1.14804		1336900	788590	548300		1435600	1223800	211800
RRP42	1.632	0.310374	0.971187		760040	490050	269990		613430	531490	81942
RRP43	1.7056	0.267274	0.986439		791520	505470	286050		785350	683040	102310
RRP45	1.80998	0.259264	1.03462		1260800	815820	444960		1225100	958850	266260
RRP46	#N/A	0.441198	#N/A		388730	237360	151370		662780	542450	120340
RRP5	6.96443	2.09949	4.53196		38236000	11101000	27135000		17740000	9629100	8110800
RRP6	1.79428	0.330106	1.06219		2338500	1460900	877640		907780	660060	247730
RRP7	8.52703	2.35691	5.44197		10897000	2600800	8296500		3889100	2024100	1864900
RRP8	1.39755	0.604015	1.00078		2126500	1372600	753880		108700	90538	18165
RRP9	5.22876	1.33129	3.28002		39438000	13687000	25750000		26726000	17873000	8853100
RRS1	#N/A	#N/A	#N/A		335550	166490	169060		128730	79246	49484
RRT14	6.45204	1.89309	4.17256		5261400	1576200	3685200		7952300	4061300	3891000
RSA3	#N/A	#N/A	#N/A		250230	159530	90707		0	0	0
SAC7	#N/A	1.63227	#N/A		210080	160270	49810		82008	49351	32657
SAM1	5.75585	1.79283	3.77434		411240	144840	266400		217300	130590	86712
SAM2	5.12781	1.98884	3.55833		1127100	418680	708440		610100	320800	289300
SAS10	5.56696	1.35891	3.46293		22491000	7336400	15155000		21208000	13276000	7931400
SBE2	#N/A	#N/A	#N/A		0	0	0		21669	1977.3	19692
SBE22	#N/A	#N/A	#N/A		0	0	0		0	0	0
SDA1	#N/A	#N/A	#N/A		283110	155160	127950		0	0	0
SEC3	#N/A	#N/A	#N/A		0	0	0		0	0	0
SEC53	6.60615	8.13618	7.37117		137880	26401	111480		91283	23160	68123
SGD1	1.89979	0.452403	1.17609		9500700	5663300	3837400		2299000	1904000	394960
SGS1	#N/A	#N/A	#N/A		66162	63517	2645		0	0	0
SGT1	#N/A	#N/A	#N/A		0	0	0		0	0	0
SHE1	#N/A	#N/A	#N/A		0	0	0		0	0	0
SIR4	#N/A	#N/A	#N/A		0	0	0		9954.6	8710.4	1244.2
SKI6	1.82259	0.400088	1.11134		1395500	866720	528820		214380	198850	15532
SLD3	#N/A	#N/A	#N/A		129290	83360	45933		0	0	0
SLX9	#N/A	1.62888	#N/A		0	0	0		216810	116370	100440
SNU13	3.76852	0.939896	2.35421		6915000	3102100	3812800		4153300	2939300	1214000
SOF1	6.09066	1.5371	3.81388		34525000	10655000	23870000		22315000	13608000	8707000
SPB1	#N/A	#N/A	#N/A		36691	23767	12923		0	0	0
SRO7	#N/A	#N/A	#N/A		0	0	0		0	0	0
SRO9	2.60095	#N/A	#N/A		370380	194990	175390		33253	16429	16824
SRP40	1.15366	0.707932	0.930796		4800800	2098300	2702500		4833700	3699600	1134100
SSA1	1.8768	1.92029	1.89854		157670	68440	89227		219840	69213	150630
SSA2	2.49488	1.41144	1.95316		4524800	2429000	2095800		2231100	1386300	844870
SSB1	3.37292	1.86883	2.62088		4897600	2216800	2680700		3064200	1761100	1303200
SSB2	#N/A	1.71122	#N/A		0	0	0		108430	58081	50345
SSC1	#N/A	1.88788	#N/A		0	0	0		17723	9412.8	8309.8
SSD1	#N/A	#N/A	#N/A		0	0	0		0	0	0
SSE1	#N/A	17.8072	#N/A		0	0	0		141890	20551	121340
SSF1	2.85969	0.959775	1.90973		2385500	1204500	1181000		607320	428480	178840
SSK22	#N/A	#N/A	#N/A		27880	2023.9	25856		0	0	0
SSP2	#N/A	#N/A	#N/A		133500	58090	75414		103680	74704	28973
STD1	#N/A	#N/A	#N/A		0	0	0		0	0	0
STM1	#N/A	2.40471	#N/A		195390	123670	71718		117240	52638	64607
SUI3	#N/A	2.02688	#N/A		79853	40527	39327		122840	62774	60066
SUP35	1.82782	0.292093	1.05996		2818700	1429900	1388800		1019300	905280	114030
TAF12	#N/A	#N/A	#N/A		0	0	0		0	0	0
TDH2	3.06611	1.3178	2.19195		360340	168200	192140		368450	235040	133410
TDH3	2.81343	1.517	2.16522		9933700	4870400	5063400		11759000	7292300	4467000
TEF2	6.07199	4.11269	5.09234		10124000	3324500	6799400		6500100	2400500	4099500
TEF4	#N/A	8.06443	#N/A		0	0	0		70674	18837	51837
TEP1	#N/A	#N/A	#N/A		256040	130470	125580		0	0	0
TGS1	#N/A	#N/A	#N/A		0	0	0		38390	38390	0
TIF34	#N/A	3.45095	#N/A		0	0	0		107530	48143	59384
TIF4631	#N/A	#N/A	#N/A		0	0	0		8938.6	3741.9	5196.7
TIF6	2.70368	1.28408	1.99388		3920700	1761000	2159700		1427600	1100900	326700
TIM13	#N/A	#N/A	#N/A		0	0	0		124470	66209	58259
TMA23	#N/A	1.13923	#N/A		97159	40992	56168		347530	234000	113530
TOP2	#N/A	#N/A	#N/A		0	0	0		7853.6	4823.7	3030
TRF5	0.804971	0.195923	0.500447		3061000	2193000	867930		5170900	4644000	526950
TSR4	1.10632	1.03821	1.07227		2797800	1892300	905470		1249800	869850	379950
TUB1	#N/A	#N/A	#N/A		0	0	0		38318	18525	19793
TUB2	#N/A	1.78133	#N/A		167540	96781	70756		727690	393910	333790
UBP10	1.81812	0.692304	1.25521		1417400	804970	612430		1515100	1155100	360000
URA2	4.48705	3.81659	4.15182		285120	114120	171000		213360	86201	127160
URB1	1.78747	1.12131	1.45439		742290	452540	289750		135270	92381	42892
URB2	1.76699	1.18279	1.47489		273800	160100	113700		35972	21870	14102
UTP10	4.53653	1.19407	2.8653		30289000	11530000	18759000		14939000	9942200	4996500
UTP11	5.24488	1.37036	3.30762		13148000	5792200	7356200		4051500	2480300	1571200
UTP13	1.17128	1.77929	1.47528		452140000	315590000	136550000		301610000	173160000	128450000
UTP14	3.50017	1.00147	2.25082		13850000	6098600	7751700		7870500	5536400	2334100
UTP15	4.75625	1.38267	3.06946		55405000	20499000	34906000		33675000	21676000	11999000
UTP18	0.972882	0.783664	0.878273		682680000	491660000	191020000		343740000	255680000	88066000
UTP20	3.10655	0.669452	1.888		8039500	3724800	4314600		1947200	1459600	487590
UTP21	1.0153	1.4313	1.2233		578740000	419710000	159030000		279200000	173790000	105400000
UTP22	8.95939	2.4683	5.71385		27437000	6532400	20905000		16564000	7924600	8639200
UTP23	1.95481	1.19294	1.57388		1528100	887960	640180		749640	476880	272760
UTP25	1.96389	0.572169	1.26803		754490	468980	285500		286660	231200	55457
UTP30	12.5851	3.47921	8.03216		12635000	2370200	10265000		2504400	975840	1528600
UTP4	4.78283	1.42024	3.10153		50366000	18336000	32030000		33827000	21275000	12552000
UTP5	4.6191	1.38667	3.00289		40009000	14922000	25087000		33210000	21015000	12194000
UTP6	0.840374	0.425816	0.633095		291820000	221480000	70340000		30609000	25895000	4713300
UTP7	5.71909	1.46887	3.59398		30044000	10219000	19825000		22654000	14044000	8610200
UTP8	4.72854	1.40928	3.06891		44096000	16454000	27642000		40905000	25698000	15207000
UTP9	4.74296	1.35026	3.04661		35240000	12898000	22342000		43518000	27665000	15853000
VMA2	1.74842	0.663554	1.20599		1322400	789210	533140		1181300	897810	283480
VPS5	#N/A	#N/A	#N/A		85390	57621	27768		0	0	0
VPS64	#N/A	#N/A	#N/A		0	0	0		22655	22655	0
VPS71	#N/A	#N/A	#N/A		0	0	0		0	0	0
WSC4	#N/A	#N/A	#N/A		0	0	0		0	0	0
XRN1	2.23521	1.80052	2.01787		53980	29057	24923		19184	10761	8423.2
YCR016W	1.36786	1.03575	1.20181		397790	252400	145390		390810	279030	111790
YCR087C-A	#N/A	1.88596	#N/A		0	0	0		160550	121660	38893
YDJ1	2.10966	1.27283	1.69124		5671400	3040200	2631200		1839200	1151900	687240
YEF3	10.4253	8.65761	9.54145		186520	94705	91818		209650	144030	65621
YEL1	#N/A	1.32846	#N/A		640370	156570	483800		1798200	506370	1291800
YER186C	#N/A	#N/A	#N/A		221120	161330	59790		83945	51340	32605
YGR127W	#N/A	1.67606	#N/A		0	0	0		0	0	0
YGR210C	2.66701	2.01686	2.34193		0	0	0		106920	57239	49677
YGR251W	#N/A	#N/A	#N/A		844640	425950	418690		735470	396040	339440
YGR283C	#N/A	1.01838	#N/A		0	0	0		146800	98444	48354
YHB1	#N/A	0.737787	#N/A		171220	113090	58129		115970	72515	43454
YHR122W	#N/A	0.990368	#N/A		94916	44335	50581		278420	208620	69799
YIL002W-A	1.19395	1.67304	1.4335		6294300	4736300	1558000		1645900	1174500	471390
YKL023W	#N/A	#N/A	#N/A		1492300	1008700	483650		1232800	724090	508750
YKR015C	#N/A	#N/A	#N/A		171370	141190	30178		0	0	0
YLR012C	#N/A	#N/A	#N/A		118220	81904	36313		29003	18404	10599
YLR415C	#N/A	#N/A	#N/A		0	0	0		0	0	0
YMR147W	#N/A	#N/A	#N/A		0	0	0		109550	63860	45687
YMR310C	#N/A	0.882593	#N/A		0	0	0		109240	103750	5490.7
YNL050C	#N/A	0.571727	#N/A		0	0	0		0	0	0
YPR011C	#N/A	#N/A	#N/A		208480	141740	66734		140720	93359	47357
YPR137C-B	2.27197	0.919427	1.5957		397580	249310	148270		370110	299300	70801
YRA1	2.44277	1.9629	2.20283		302800	209990	92807		0	0	0
YRF1-4	#N/A	#N/A	#N/A		2385600	1432500	953100		510450	278570	231880
YSW1	#N/A	#N/A	#N/A		0	0	0		0	0	0
YTM1	2.98637	0.735797	1.86108		5082300	2529600	2552700		2025200	1567100	458120

## Sheet: 4.Diauxic shift-phospho(Fig 7A)
List of phosphosites identified and their quantification if available. The H/L ratios of individual phosphosites were normalized to the total abundance H/L of the respective protein (all peptides).
			H/L of phosphosite normalized to H/L of total protein
Name	Position	Amino acid	Experiment 1	Experiment 2	Average
ADE17	384	T	#N/A	#N/A	#N/A
ASK10	625	S	#N/A	#N/A	#N/A
ASK10	626	S	#N/A	#N/A	#N/A
ASK10	627	S	#N/A	#N/A	#N/A
ASK10	628	S	#N/A	#N/A	#N/A
ASK10	629	T	#N/A	#N/A	#N/A
ASK10	1070	S	#N/A	0.740047	#N/A
ATG17	178	T	#N/A	#N/A	#N/A
BFR2	41	S	0.619405	0.719301	0.669353
BFR2	44	S	0.588395	0.889335	0.738865
BFR2	366	S	#N/A	0.98968	#N/A
BFR2	372	S	#N/A	0.676727	#N/A
BFR2	379	S	0.602955	0.988752	0.795854
BMS1	96	S	0.903984	#N/A	#N/A
BMS1	97	T	#N/A	#N/A	#N/A
BMS1	402	S	0.903984	#N/A	#N/A
BMS1	478	S	0.903984	0.937253	0.920618
BMS1	504	T	0.903984	#N/A	#N/A
BMS1	773	T	0.903984	#N/A	#N/A
BMS1	1046	T	0.903984	#N/A	#N/A
BMS1	1048	S	0.903984	#N/A	#N/A
BUD21	137	T	#N/A	1.06255	#N/A
BUD21	144	S	0.772615	1.11692	0.944769
BUD22	251	S	#N/A	#N/A	#N/A
BUD22	257	T	#N/A	0.914747	#N/A
BUD22	283	T	#N/A	#N/A	#N/A
BUD22	284	T	#N/A	#N/A	#N/A
BUD22	285	S	#N/A	#N/A	#N/A
CBF5	46	S	#N/A	0.925906	#N/A
CBF5	47	S	#N/A	0.925906	#N/A
CBF5	378	T	3.4817	#N/A	#N/A
CBF5	395	S	#N/A	#N/A	#N/A
CBF5	396	T	#N/A	#N/A	#N/A
CBF5	397	S	#N/A	0.668293	#N/A
CBF5	398	S	1.00168	#N/A	#N/A
CBF5	399	S	#N/A	1.06397	#N/A
CBF5	402	T	#N/A	#N/A	#N/A
CDC14	467	S	#N/A	#N/A	#N/A
CIC1	7	S	0.256792	0.37887	0.317831
CIC1	10	S	0.256792	#N/A	#N/A
CIC1	17	S	#N/A	0.37887	#N/A
CIC1	365	S	#N/A	1.25033	#N/A
DBP10	101	S	#N/A	1.09728	#N/A
DBP7	2	S	#N/A	1.48854	#N/A
DBP7	6	S	#N/A	1.51718	#N/A
DCN1	221	T	#N/A	#N/A	#N/A
DIP2	375	T	1.80071	#N/A	#N/A
DIP2	727	S	2.4518	1.46348	1.95764
DIP2	736	S	1.84924	1.23147	1.54036
DIP2	931	S	#N/A	0.939986	#N/A
DIP2	933	S	1.22769	1.10536	1.16652
ECM16	223	S	#N/A	1.43507	#N/A
EFR3	564	S	#N/A	#N/A	#N/A
EFR3	771	S	#N/A	#N/A	#N/A
ENP1	189	T	#N/A	#N/A	#N/A
ENP1	190	S	#N/A	#N/A	#N/A
ENP2	524	T	0.330565	0.958246	0.644405
ENP2	529	S	0.323438	0.917939	0.620688
ENP2	671	S	0.264776	0.785965	0.52537
ENP2	672	S	0.264776	0.919759	0.592267
ESF1	86	S	2.751	1.6309	2.19095
ESF1	220	T	#N/A	#N/A	#N/A
ESF1	223	S	#N/A	#N/A	#N/A
ESF1	225	S	#N/A	#N/A	#N/A
ESF1	367	S	#N/A	2.27483	#N/A
ESF1	372	S	#N/A	2.27483	#N/A
ESF2	7	S	#N/A	#N/A	#N/A
ESF2	13	S	#N/A	#N/A	#N/A
ESF2	14	S	#N/A	#N/A	#N/A
GEA2	299	S	#N/A	#N/A	#N/A
GEA2	300	T	#N/A	#N/A	#N/A
GIN4	462		#N/A	#N/A	#N/A
GTO3	241	Y	#N/A	#N/A	#N/A
GYP7	250		#N/A	#N/A	#N/A
HAS1	9	S	1.00665	#N/A	#N/A
HAS1	15	T	#N/A	#N/A	#N/A
HCA4	692	S	#N/A	1.06546	#N/A
IDH1	68	T	#N/A	#N/A	#N/A
IME4	527	T	#N/A	#N/A	#N/A
IRS4	358	T	#N/A	#N/A	#N/A
IRS4	361	S	#N/A	#N/A	#N/A
IRS4	362	T	#N/A	#N/A	#N/A
IRS4	370	S	#N/A	#N/A	#N/A
IRS4	371	S	#N/A	#N/A	#N/A
KRE33	1001	S	#N/A	1.07122	#N/A
KRI1	486	S	0.348273	0.962856	0.655565
LCB1	518		#N/A	#N/A	#N/A
LCP5	253	S	#N/A	0.666478	#N/A
LCP5	287	T	#N/A	0.3824	#N/A
MAK11	430	S	#N/A	0.756678	#N/A
MAK11	434	S	#N/A	0.600899	#N/A
MAK11	436	T	#N/A	1.13943	#N/A
MAK21	706	Y	#N/A	#N/A	#N/A
MAK21	710	S	#N/A	0.974714	#N/A
MAK21	878	S	0.740398	0.992376	0.866387
MAK21	1024	S	#N/A	#N/A	#N/A
MAK5	138	S	#N/A	0.999316	#N/A
MAK5	678	S	1.0328	0.998474	1.01564
MMS4	124	S	#N/A	#N/A	#N/A
MMS4	128	S	#N/A	#N/A	#N/A
MMS4	133	S	#N/A	#N/A	#N/A
MMS4	134	S	#N/A	#N/A	#N/A
MPP10	168	S	#N/A	2.3203	#N/A
MPP10	169	S	#N/A	2.3203	#N/A
MPP10	176	S	0.992615	1.63377	1.31319
MPP10	177	S	1.10939	1.31741	1.2134
MPP10	181	Y	0.960416	#N/A	#N/A
MRD1	220	S	0.559282	0.897035	0.728159
MRD1	264	S	2.21003	2.0208	2.11542
MTR4	34	T	1.42435	1.04666	1.2355
NET1	228	S	#N/A	#N/A	#N/A
NET1	231	S	#N/A	#N/A	#N/A
NET1	497	S	#N/A	#N/A	#N/A
NHP10	98	T	#N/A	#N/A	#N/A
NIS1	127		#N/A	#N/A	#N/A
NOC2	149	S	0.499792	0.903044	0.701418
NOP12	70	S	2.73507	1.78588	2.26047
NOP12	181	T	1.07974	#N/A	#N/A
NOP12	184	S	1.10137	1.07572	1.08855
NOP12	193	S	#N/A	1.08373	#N/A
NOP13	2	S	2.28632	1.65249	1.96941
NOP8	264	T	#N/A	1.16845	#N/A
NOP8	268	S	1.21423	0.866282	1.04026
NOP8	370	S	1.20945	0.96353	1.08649
NPR3	486	S	#N/A	#N/A	#N/A
OCH1	2	S	#N/A	#N/A	#N/A
PAF1	147	S	#N/A	#N/A	#N/A
PFK2	171	S	#N/A	#N/A	#N/A
PGS1	162	Y	#N/A	#N/A	#N/A
PMT5	16	T	#N/A	#N/A	#N/A
PNO1	47	S	#N/A	1.68035	#N/A
PNO1	254	S	#N/A	0.653842	#N/A
POL3	873		#N/A	#N/A	#N/A
POP4	53	S	#N/A	1.53303	#N/A
PPZ1	690	S	#N/A	#N/A	#N/A
PRP22	846	T	#N/A	#N/A	#N/A
PRP43	8	S	0.45816	0.435707	0.446933
PRP43	9	S	0.45816	#N/A	#N/A
PRP8	1389	Y	#N/A	#N/A	#N/A
PSP2	340	S	#N/A	#N/A	#N/A
PUF6	34	S	#N/A	0.950908	#N/A
PUF6	35	S	#N/A	0.960825	#N/A
PWP1	52	S	0.671342	0.712923	0.692132
PWP2	232	S	#N/A	0.910981	#N/A
PWP2	636	T	#N/A	1.28334	#N/A
PWP2	651	S	1.43561	1.02326	1.22943
PWP2	912	S	#N/A	0.704465	#N/A
PWP2	913	S	0.923603	0.689982	0.806792
PXR1	227	S	#N/A	#N/A	#N/A
PXR1	228	S	#N/A	#N/A	#N/A
PXR1	230	S	#N/A	1.97625	#N/A
RAD14	105	T	#N/A	#N/A	#N/A
RCL1	2	S	#N/A	#N/A	#N/A
RCL1	3	S	#N/A	#N/A	#N/A
RCL1	4	S	#N/A	#N/A	#N/A
RCL1	14	S	#N/A	#N/A	#N/A
RCL1	124	S	#N/A	#N/A	#N/A
RCL1	201	S	#N/A	#N/A	#N/A
RCL1	203	S	#N/A	#N/A	#N/A
RCL1	238	S	#N/A	#N/A	#N/A
RCL1	266	S	#N/A	#N/A	#N/A
RCL1	360	T	#N/A	#N/A	#N/A
RFC1	79	S	#N/A	#N/A	#N/A
RFC1	80	S	#N/A	#N/A	#N/A
RIM15	1502	S	#N/A	#N/A	#N/A
RIM15	1504	S	#N/A	#N/A	#N/A
RPG1	300	T	#N/A	#N/A	#N/A
RPG1	301	T	#N/A	#N/A	#N/A
RPL16B	135;136	T	#N/A	#N/A	#N/A
RPL16B	136;137	T	#N/A	#N/A	#N/A
RPS12	2	S	#N/A	1.83548	#N/A
RRP36	14	S	0.574819	#N/A	#N/A
RRP36	41	S	#N/A	#N/A	#N/A
RRP36	42	S	#N/A	#N/A	#N/A
RRP5	187	S	0.645889	0.994196	0.820043
RRP5	188	S	0.645889	0.804114	0.725002
RRP5	1724	S	#N/A	0.278061	#N/A
RRP9	175	S	#N/A	0.90056	#N/A
RRP9	176	S	#N/A	0.90056	#N/A
RSA3	83	S	#N/A	#N/A	#N/A
RSA3	88	T	#N/A	#N/A	#N/A
RSA4	133	T	#N/A	#N/A	#N/A
SAS10	9	T	#N/A	#N/A	#N/A
SAS10	11	T	#N/A	#N/A	#N/A
SAS10	12	S	#N/A	#N/A	#N/A
SAS10	314	S	#N/A	#N/A	#N/A
SAS10	316	S	#N/A	#N/A	#N/A
SAS10	336	S	0.820787	0.937414	0.8791
SAS10	339	S	0.152461	0.4518	0.30213
SAS10	477	S	0.632648	1.04062	0.836635
SAS10	485	S	#N/A	1.01893	#N/A
SMC1	653	T	#N/A	#N/A	#N/A
SOF1	160	S	#N/A	0.968394	#N/A
SOF1	165	S	#N/A	0.749015	#N/A
SRO7	24	T	#N/A	#N/A	#N/A
SRP40	133	S	1.35725	1.05428	1.20576
SRP40	293	S	#N/A	#N/A	#N/A
SRP40	298	T	#N/A	#N/A	#N/A
SRP40	301	S	1.4602	1.09422	1.27721
SRP40	302	S	#N/A	1.12514	#N/A
SRP40	394	S	3.37188	#N/A	#N/A
SSD1	492	S	#N/A	#N/A	#N/A
SUM1	13	T	#N/A	#N/A	#N/A
SVL3	558	S	#N/A	#N/A	#N/A
TIF4632	913	S	#N/A	#N/A	#N/A
TOM70	253	S	#N/A	#N/A	#N/A
TPO4	62		#N/A	#N/A	#N/A
TRE2	374		#N/A	#N/A	#N/A
TRF5	9	S	0.963869	#N/A	#N/A
TRF5	11	T	1.19979	#N/A	#N/A
TRF5	596	S	#N/A	0.784458	#N/A
TRF5	602	S	#N/A	1.03084	#N/A
TSC11	84	S	#N/A	#N/A	#N/A
TSC11	87	S	#N/A	#N/A	#N/A
UPC2	110	S	#N/A	#N/A	#N/A
UTP10	13	S	#N/A	1.50069	#N/A
UTP13	359	S	1.50813	1.10051	1.30432
UTP13	361	S	1.41026	1.00268	1.20647
UTP13	668	S	2.43871	#N/A	#N/A
UTP14	34	S	#N/A	0.853056	#N/A
UTP14	35	S	#N/A	0.801883	#N/A
UTP14	151	S	1.58561	1.25577	1.42069
UTP14	221	S	#N/A	0.915956	#N/A
UTP14	423	S	#N/A	1.23777	#N/A
UTP14	424	S	#N/A	0.940506	#N/A
UTP14	488	S	0.764977	1.02636	0.895667
UTP14	500	S	0.859231	1.08061	0.96992
UTP14	562	S	0.767425	0.938285	0.852855
UTP14	640	S	#N/A	0.947998	#N/A
UTP14	668	S	#N/A	0.962627	#N/A
UTP14	673	T	0.865567	0.770315	0.817941
UTP14	738	S	#N/A	0.494747	#N/A
UTP15	338	S	#N/A	#N/A	#N/A
UTP15	339	S	0.518622	0.804703	0.661663
UTP18	31	T	2.38434	1.19912	1.79173
UTP18	149	S	#N/A	0.50759	#N/A
UTP18	153	S	0.92704	0.850177	0.888608
UTP18	213	S	1.5308	1.35345	1.44213
UTP18	214	T	#N/A	#N/A	#N/A
UTP18	223	S	#N/A	0.830058	#N/A
UTP18	297	T	#N/A	#N/A	#N/A
UTP18	299	T	#N/A	#N/A	#N/A
UTP18	332	T	2.03589	#N/A	#N/A
UTP18	334	S	#N/A	1.22649	#N/A
UTP18	474	S	1.78282	0.961543	1.37218
UTP20	1827	S	#N/A	1.20327	#N/A
UTP21	16	S	0.867851	0.843415	0.855633
UTP21	329	S	#N/A	4.87895	#N/A
UTP21	332	S	6.34193	3.89711	5.11952
UTP21	729	S	0.938634	#N/A	#N/A
UTP21	763	S	1.4827	1.16354	1.32312
UTP21	772	S	#N/A	0.845382	#N/A
UTP22	10	S	0.848598	0.709225	0.778912
UTP22	12	T	#N/A	#N/A	#N/A
UTP22	13	S	0.772499	#N/A	#N/A
UTP22	35	S	#N/A	#N/A	#N/A
UTP22	41	S	#N/A	0.247511	#N/A
UTP22	49	T	#N/A	0.973121	#N/A
UTP22	58	S	#N/A	1.18041	#N/A
UTP22	60	T	#N/A	0.949468	#N/A
UTP23	186	S	#N/A	0.949986	#N/A
UTP30	270	S	#N/A	0.806095	#N/A
UTP8	94	S	1.40409	0.98984	1.19697
UTP8	95	T	1.48695	1.26915	1.37805
UTP8	142	T	#N/A	#N/A	#N/A
UTP8	143	S	#N/A	1.48519	#N/A
UTP8	148	S	1.33991	1.43228	1.3861
UTP8	150	S	1.62446	1.40957	1.51701
UTP9	564	S	#N/A	1.69668	#N/A
WSC4	339	T	#N/A	#N/A	#N/A
WSC4	342	S	#N/A	#N/A	#N/A
WSC4	345	T	#N/A	#N/A	#N/A
WSC4	346	S	#N/A	#N/A	#N/A
XRN1	1505	S	#N/A	#N/A	#N/A
XRN1	1506	T	#N/A	#N/A	#N/A
XRN1	1510	S	#N/A	1.04671	#N/A
YAR009C	534;1093;1093;1093;1093;1093;1093;1093;1093;1093;1093;1093;1093;1093;1093;1093;1093;1093;1093;1094;1093;1093	S	#N/A	#N/A	#N/A
YAR009C	536;1095;1095;1095;1095;1095;1095;1095;1095;1095;1095;1095;1095;1095;1095;1095;1095;1095;1095;1096;1095;1095	S	#N/A	#N/A	#N/A
YDR282C	61	T	#N/A	#N/A	#N/A
YEF3	1039	S	#N/A	#N/A	#N/A
YEF3	1040	S	#N/A	#N/A	#N/A
YER156C	14	S	#N/A	#N/A	#N/A
YEF3	1039	S	#N/A	#N/A	#N/A
YEF3	1040	S	#N/A	#N/A	#N/A
YER156C	14	S	#N/A	#N/A	#N/A

## Sheet: 5. Rapamycin-phospho
List of phosphosites identified and their quantification if available. The H/L ratios of individual phosphosites were normalized to the total abundance H/L of the respective protein (all peptides).
			H/L of phosphosite normalized to H/L of total protein
Name	Position within protein	Amino acid	Experiment 1	Experiment 2	Average
AIR1	20	T
ASK10	1070	S		0.966859
AVO1	429	S
AVO1	431	S
AVO1	433	S
AVO1	1023	S
AVO1	1024	S
AVO1	1026	S
AVO1	1027	S
BFR2	379	S	0.694086	0.966084	0.830085
BFR2	372	S		0.936885
BFR2	366	S		0.992761
BFR2	41	S
BFR2	44	S
BUD21	144	S	1.09279	1.09165	1.09222
BUD22	285	S		0.848222
BUD22	257	T
BUD22	283	T
BUD22	284	T
BUD22	255	Y
CBF5	399	S		0.87748
CBF5	378	T
CDC14	467	S		1.15144
CDC14	546	S
CIC1	14	S	1.14382
CIC1	7	S	1.04763	0.897116	0.972373
CIC1	10	S	1.04763
CIC1	5	S		0.341183
CIC1	11	T
CUL3	297	Y
DBP10	101	S		1.08551
DIP2	727	S	1.63256	1.17491	1.40373
DIP2	736	S	1.60668	1.13218	1.36943
DIP2	376	S	1.0272	1.30253	1.16486
DIP2	931	S		1.16142
DIP2	933	S		1.23835
DIP2	712	S		1.26737
DIP2	711	T
DOP1	1008	Y
EFR3	771	S		0.801403
ENP1	190	S
ENP2	529	S	0.818036	0.952367	0.885202
ENP2	672	S		0.877989
ENP2	671	S		1.02887
ESF1	369	S		1.05203
ESF1	372	S		1.05203
ESF1	86	S		1.28849
ESF2	7	S		0.709906
ESF2	13	S		0.813899
ESF2	14	S		0.815903
ESF2	47	S		0.916939
ESF2	51	S		0.916939
FAR10	419	S
FAR10	422	S
FAR10	420	T
HAS1	14	S		0.986287
HCA4	692	S		0.863577
HHO1	130	S		2.78609
KRI1	486	S	0.883654	0.850243	0.866948
LCP5	288	S
LHP1	15	S
MAK11	430	S		0.832861
MAK11	434	S		0.852667
MAK11	436	T
MAK21	710	S	1.19059	0.937412	1.064
MAK21	133	S		0.924437
MAK21	73	S		0.936178
MAK21	80	S		0.936178
MAK21	878	S		1.07899
MAK21	708	Y
MAK5	678	S		0.925269
MAK5	138	S		1.28665
MAK5	135	T
MPP10	177	S	1.31881	1.77111	1.54496
MPP10	169	S		0.971462
MPP10	176	S		1.47116
MPP10	181	Y
MRD1	264	S		1.26686
MSS4	477	S
MTR4	34	T
NET1	1032	S	0.835145	0.964899	0.900022
NET1	497	S		1.13617
NET1	439	S		1.27077
NOC2	149	S		0.78938
NOC2	160	S		0.78938
NOP12	184	S		1.38058
NOP12	192	S
NOP12	193	S
NOP12	74	T
NOP12	181	T
NOP13	2	S	1.441	1.24311	1.34206
NOP13	101	S
NOP13	4	T
NOP13	105	T
NOP8	370	S		0.538847
NOP8	268	S		0.935132
NPR3	486	S
NUM1	1655	T
PNO1	47	S		1.66163
PRP43	8	S	0.419998
PUF6	34	S		1.00754
PUF6	35	S		1.00754
PWP1	52	S	1.22386	0.995652	1.10976
PWP2	651	S	1.4487	0.956947	1.20282
PWP2	913	S	1.0813	0.903891	0.992595
PWP2	912	S		0.894741
PWP2	640	S		1.07054
PWP2	636	T
PXR1	227	S	1.24365
PXR1	230	S		1.37133
RFC1	40	S		0.898945
RIF1	1637	S
RPC37	169	Y
RRP12	1186	S
RRP36	41	S
RRP36	42	S
RRP36	14	S
RRP5	187	S		1.0024
RRP5	188	S		1.0024
RRP5	1724	S		1.17087
RRP9	175	S		0.729039
RRP9	176	S		0.729039
RSA3	83	S
RSA3	88	T
SAS10	477	S	1.12337	0.841795	0.982583
SAS10	339	S		0.668438
SAS10	314	S		0.88066
SAS10	485	S		1.1618
SAS10	336	S		1.27206
SOF1	165	S		0.861617
SOK1	756	T
SPB1	529	S		0.855666
SRP40	301	S	1.33597	0.969598	1.15278
SRP40	133	S	1.05894
SRP40	289	T		1.08175
SSD1	492	S
SSF1	256	S		0.657784
SSF1	255	T		0.657784
THR4	8	Y
TRF5	602	S		0.548536
TRF5	596	S		0.661438
TRF5	611	T		1.4076
TRF5	623	T		1.81109
TRM44	231	Y
TSC11	50	S
TSC11	52	S
TSC11	265	S
TSC11	84	S
TSC11	87	S
TSC11	86	T
UBP10	319	T		8.87013
UBP10	323	T		8.87013
URA2	712	Y
UTP13	668	S	1.77295	1.03157	1.40226
UTP13	359	S	1.64245	1.27659	1.45952
UTP13	361	S	1.62057
UTP14	151	S	1.51673
UTP14	562	S	1.20705	0.929059	1.06806
UTP14	500	S	0.92158	0.976578	0.949079
UTP14	738	S		0.655163
UTP14	423	S		0.855944
UTP14	668	S		0.925537
UTP14	498	T		0.936535
UTP14	424	S		1.01687
UTP14	488	S		1.17654
UTP15	339	S		0.949792
UTP15	338	S		1.31478
UTP18	213	S	0.995161	1.47289	1.23403
UTP18	153	S		0.60453
UTP18	149	S		1.23725
UTP18	336	T		1.37049
UTP18	31	T		1.51715
UTP21	332	S	1.73638
UTP21	763	S	1.73625	1.54867	1.64246
UTP22	10	S	0.607688	1.4755	1.04159
UTP22	13	S		0.714593
UTP22	41	S		0.835958
UTP22	64	S		1.31332
UTP22	58	S
UTP22	60	T
UTP6	254	S	0.409965	1.52877	0.969369
UTP8	94	S	1.1951	1.06233	1.12871
UTP8	95	T	1.16109	1.10668	1.13389
UTP8	150	S		1.28307
UTP8	148	S		1.49861
UTP9	93	S		0.859892
UTP9	564	S		1.30767
XRN1	1510	S		0.575206
YDR333C	119	S
YEL020C	498	Y
YOR131C	127	Y
YPL150W	533	S
YPL150W	528	T

## Sheet: 6. TBB-phospho (Fig 7B)
List of phosphosites identified and their quantification if available. The H/L ratios of individual phosphosites were normalized to the total abundance H/L of the respective protein (all peptides).
			H/L of phosphosite normalized to H/L of total protein
Name	Position within protein	Amino acid	Experiment 1	Experiment 2	Average
ABM1	110	S	#N/A	#N/A	#N/A
ABM1	112	S	#N/A	#N/A	#N/A
AGP3	529	S	#N/A	#N/A	#N/A
AGP3	533	S	#N/A	#N/A	#N/A
AGP3	534	S	#N/A	#N/A	#N/A
ARP4	416	S	#N/A	#N/A	#N/A
ASF1	2	S	#N/A	#N/A	#N/A
ASI3	416	S	#N/A	#N/A	#N/A
ASK10	1070	S	0.978701	#N/A	#N/A
ATC1	218	S	#N/A	#N/A	#N/A
ATC1	221	S	#N/A	#N/A	#N/A
BFR2	372	S	#N/A	0.622895	#N/A
BFR2	379	S	1.07211	0.905233	0.988671
BFR2	366	S	#N/A	0.853148	#N/A
BFR2	41	S	#N/A	1.16241	#N/A
BFR2	44	S	1.1778	1.17518	1.17649
BFR2	49	S	#N/A	0.649691	#N/A
BMS1	478	S	#N/A	1.25423	#N/A
BUD21	144	S	0.993842	0.933625	0.963733
BUD21	39	S	#N/A	#N/A	#N/A
BUD21	40	S	#N/A	#N/A	#N/A
BUD22	285	S	0.565229	0.959514	0.762372
BUD22	367	S	#N/A	#N/A	#N/A
CBF5	395	S	#N/A	#N/A	#N/A
CBF5	397	S	#N/A	#N/A	#N/A
CBF5	398	S	#N/A	#N/A	#N/A
CBF5	399	S	#N/A	#N/A	#N/A
CBF5	46	S	#N/A	#N/A	#N/A
CDC19	450	S	#N/A	#N/A	#N/A
CDC6	238	S	#N/A	#N/A	#N/A
CIC1	10	S	#N/A	#N/A	#N/A
CIC1	14	S	#N/A	#N/A	#N/A
CIC1	17	S	#N/A	#N/A	#N/A
CIC1	5	S	#N/A	#N/A	#N/A
CIC1	366	S	#N/A	#N/A	#N/A
CYK3	553	S	#N/A	#N/A	#N/A
CYR1	497	S	#N/A	#N/A	#N/A
CYR1	502	S	#N/A	#N/A	#N/A
DAL2	18	S	#N/A	#N/A	#N/A
DFG5	6	S	#N/A	#N/A	#N/A
DIP2	727	S	1.19922	1.09996	1.14959
DIP2	736	S	1.1164	1.08557	1.10098
DIP2	712	S	#N/A	1.08916	#N/A
DIP2	931	S	#N/A	1.43238	#N/A
DIP2	376	S	#N/A	0.905644	#N/A
DNF3	1480	S	#N/A	#N/A	#N/A
EDC3	64	S	#N/A	#N/A	#N/A
EDC3	66	S	#N/A	#N/A	#N/A
EFR3	771	S	#N/A	#N/A	#N/A
ENP2	529	S	0.903157	1.09913	1.00114
ENP2	555	S	#N/A	#N/A	#N/A
ENP2	671	S	#N/A	1.32167	#N/A
ENP2	672	S	#N/A	1.37273	#N/A
ERB1	23	S	#N/A	#N/A	#N/A
ESF1	369	S	#N/A	1.08518	#N/A
ESF1	372	S	#N/A	1.08518	#N/A
ESF1	86	S	#N/A	0.732689	#N/A
ESF1	223	S	#N/A	#N/A	#N/A
ESF2	47	S	#N/A	0.973026	#N/A
ESF2	51	S	#N/A	0.973026	#N/A
ESF2	7	S	#N/A	0.667177	#N/A
ESF2	13	S	#N/A	3.13164	#N/A
ESF2	14	S	#N/A	3.13164	#N/A
ESP1	1135	S	1.1065	#N/A	#N/A
ESP1	1136	S	1.1065	#N/A	#N/A
FAR1	110	S	#N/A	#N/A	#N/A
FAR1	120	S	#N/A	#N/A	#N/A
FAR1	121	S	#N/A	#N/A	#N/A
FRT1	544	S	#N/A	#N/A	#N/A
FRT1	545	S	#N/A	#N/A	#N/A
GRR1	491	S	#N/A	#N/A	#N/A
HAS1	12	S	#N/A	1.27438	#N/A
HCA4	692	S	0.970466	1.6417	1.30608
HLR1	16	S	#N/A	#N/A	#N/A
HTB2	11	S	#N/A	2.11465	#N/A
ILV1	23	S	#N/A	#N/A	#N/A
IML2	628	S	#N/A	#N/A	#N/A
IRC5	47	S	#N/A	#N/A	#N/A
IRC5	51	S	#N/A	#N/A	#N/A
IRC5	562	S	#N/A	#N/A	#N/A
KRI1	486	S	0.830044	0.861299	0.845671
LDH1	278	S	#N/A	#N/A	#N/A
LHP1	15	S	#N/A	2.01953	#N/A
MAK11	430	S	#N/A	0.351677	#N/A
MAK11	434	S	#N/A	0.888747	#N/A
MAK21	878	S	#N/A	1.23476	#N/A
MAK21	129	S	#N/A	#N/A	#N/A
MAK21	130	S	#N/A	#N/A	#N/A
MAK21	73	S	#N/A	0.922805	#N/A
MAK21	80	S	#N/A	0.922805	#N/A
MAK21	710	S	#N/A	0.944342	#N/A
MAK5	678	S	#N/A	1.2839	#N/A
MCR1	88	S	#N/A	#N/A	#N/A
MED4	150	S	#N/A	#N/A	#N/A
MGA1	43	S	#N/A	#N/A	#N/A
MLH1	80	S	#N/A	#N/A	#N/A
MLH3	79	S	#N/A	#N/A	#N/A
MLH3	381	S	#N/A	#N/A	#N/A
MLH3	383	S	#N/A	#N/A	#N/A
MLH3	384	S	#N/A	#N/A	#N/A
MLP2	306	S	#N/A	#N/A	#N/A
MPP10	176	S	1.97425	1.87221	1.92323
MPP10	177	S	1.55175	1.39618	1.47397
MPP10	168	S	#N/A	#N/A	#N/A
MPP10	169	S	#N/A	0.591833	#N/A
MPP10	537	S	#N/A	0.803503	#N/A
MRD1	264	S	#N/A	1.55906	#N/A
MRD1	220	S	#N/A	0.933072	#N/A
MTC7	68	S	#N/A	#N/A	#N/A
MTC7	70	S	#N/A	#N/A	#N/A
MTG2	213	S	#N/A	#N/A	#N/A
MTG2	222	S	#N/A	#N/A	#N/A
NAN1	413	S	#N/A	#N/A	#N/A
NCP1	403	S	#N/A	#N/A	#N/A
NMA1	95	S	#N/A	0.657885	#N/A
NMA1	96	S	#N/A	0.657885	#N/A
NMD2	457	S	#N/A	#N/A	#N/A
NMD2	461	S	#N/A	#N/A	#N/A
NOC2	363	S	#N/A	#N/A	#N/A
NOP12	70	S	#N/A	1.14318	#N/A
NOP12	184	S	0.87911	0.919779	0.899445
NOP12	192	S	#N/A	#N/A	#N/A
NOP12	193	S	0.83297	#N/A	#N/A
NOP13	2	S	1.03769	0.908819	0.973253
NOP8	268	S	#N/A	0.825691	#N/A
NOP8	370	S	0.811183	1.02333	0.917258
NPR2	373	S	#N/A	#N/A	#N/A
NPR2	374	S	#N/A	#N/A	#N/A
NPR2	375	S	#N/A	#N/A	#N/A
NPR2	382	S	#N/A	#N/A	#N/A
NPR3	486	S	#N/A	#N/A	#N/A
OSH6	244	S	#N/A	#N/A	#N/A
OXP1	657	S	0.697616	#N/A	#N/A
OXP1	594	S	#N/A	#N/A	#N/A
PAN1	280	S	#N/A	#N/A	#N/A
PAN1	290	S	#N/A	#N/A	#N/A
PCL6	348	S	#N/A	#N/A	#N/A
PDR16	321	S	#N/A	#N/A	#N/A
PDR16	329	S	#N/A	#N/A	#N/A
PEP8	41	S	#N/A	#N/A	#N/A
PEP8	50	S	#N/A	#N/A	#N/A
PNO1	254	S	#N/A	0.366428	#N/A
PNO1	47	S	#N/A	2.13163	#N/A
PRP43	8	S	#N/A	0.846353	#N/A
PSP2	278	S	#N/A	#N/A	#N/A
PSP2	279	S	#N/A	#N/A	#N/A
PSY2	220	S	#N/A	#N/A	#N/A
PUF6	34	S	#N/A	#N/A	#N/A
PUF6	35	S	#N/A	#N/A	#N/A
PWP1	52	S	0.534635	0.628824	0.58173
PWP2	912	S	#N/A	0.87296	#N/A
PWP2	913	S	0.863194	0.757175	0.810185
PWP2	640	S	#N/A	1.19294	#N/A
PWP2	651	S	0.851813	0.940522	0.896167
PXR1	227	S	0.562647	#N/A	#N/A
PXR1	228	S	#N/A	#N/A	#N/A
RAD54	548	S	#N/A	#N/A	#N/A
RAT1	775	S	#N/A	#N/A	#N/A
RFC1	79	S	#N/A	0.846133	#N/A
RGC1	423	S	#N/A	#N/A	#N/A
RGC1	428	S	#N/A	#N/A	#N/A
RIM15	828	S	#N/A	#N/A	#N/A
RPS6B	232;232	S	#N/A	0.372894	#N/A
RPS6B	233;233	S	#N/A	0.372894	#N/A
RRP12	1186	S	#N/A	#N/A	#N/A
RRP36	41	S	#N/A	0.896037	#N/A
RRP36	42	S	#N/A	0.896037	#N/A
RRP36	14	S	#N/A	0.785712	#N/A
RRP5	1724	S	3.41983	5.96248	4.69115
RRP5	20	S	#N/A	#N/A	#N/A
RRP5	187	S	#N/A	0.438092	#N/A
RRP5	188	S	#N/A	1.00851	#N/A
RRP9	176	S	2.05911	1.59253	1.82582
RRT14	197	S	#N/A	0.806558	#N/A
RRT14	202	S	#N/A	0.806558	#N/A
RSA3	83	S	#N/A	#N/A	#N/A
SAC7	190	S	#N/A	0.792976	#N/A
SAS10	477	S	0.9377	1.04897	0.993334
SAS10	336	S	#N/A	1.13061	#N/A
SAS10	339	S	0.854447	0.91494	0.884693
SAS10	533	S	#N/A	#N/A	#N/A
SAS10	314	S	#N/A	0.943872	#N/A
SAS10	316	S	#N/A	#N/A	#N/A
SAS10	485	S	4.54447	2.90659	3.72553
SAS10	12	S	#N/A	#N/A	#N/A
SBE2	14	S	#N/A	#N/A	#N/A
SBE22	262	S	#N/A	#N/A	#N/A
SBE22	263	S	#N/A	#N/A	#N/A
SDA1	734	S	#N/A	#N/A	#N/A
SDA1	739	S	#N/A	#N/A	#N/A
SEC3	24	S	#N/A	#N/A	#N/A
SGT1	225	S	#N/A	#N/A	#N/A
SGT1	227	S	#N/A	#N/A	#N/A
SHE1	71	S	#N/A	#N/A	#N/A
SIR4	1078	S	#N/A	#N/A	#N/A
SLD3	155	S	#N/A	#N/A	#N/A
SOF1	165	S	1.13427	2.25133	1.6928
SRP40	301	S	#N/A	0.787747	#N/A
SRP40	133	S	#N/A	0.796737	#N/A
SRP40	293	S	#N/A	1.12371	#N/A
SSD1	492	S	#N/A	#N/A	#N/A
SSP2	245	S	#N/A	#N/A	#N/A
TEP1	114	S	#N/A	#N/A	#N/A
TGS1	279	S	#N/A	#N/A	#N/A
TGS1	285	S	#N/A	#N/A	#N/A
TIM13	4	S	#N/A	#N/A	#N/A
TIM13	5	S	#N/A	#N/A	#N/A
TRF5	9	S	#N/A	0.802315	#N/A
TRF5	613	S	#N/A	1.4072	#N/A
UTP13	359	S	0.984694	0.835741	0.910217
UTP14	562	S	0.784998	0.647512	0.716255
UTP14	668	S	0.781499	0.88847	0.834985
UTP14	34	S	#N/A	0.657032	#N/A
UTP14	35	S	#N/A	0.74259	#N/A
UTP14	423	S	#N/A	2.78143	#N/A
UTP14	424	S	2.69171	3.70522	3.19847
UTP14	738	S	#N/A	0.911792	#N/A
UTP14	488	S	#N/A	1.04893	#N/A
UTP14	500	S	0.870254	0.77461	0.822432
UTP14	679	S	#N/A	0.456522	#N/A
UTP14	151	S	1.1211	1.21889	1.16999
UTP15	338	S	#N/A	0.811317	#N/A
UTP15	339	S	#N/A	0.964048	#N/A
UTP18	213	S	3.80381	3.94519	3.8745
UTP18	474	S	0.86377	#N/A	#N/A
UTP18	166	S	1.87967	1.17788	1.52878
UTP18	149	S	#N/A	1.1951	#N/A
UTP18	153	S	#N/A	1.94318	#N/A
UTP18	293	S	#N/A	0.523548	#N/A
UTP21	332	S	#N/A	#N/A	#N/A
UTP21	16	S	#N/A	0.548328	#N/A
UTP21	763	S	1.10773	1.10682	1.10727
UTP21	772	S	#N/A	1.00994	#N/A
UTP22	41	S	#N/A	0.925465	#N/A
UTP22	10	S	4.18587	3.94335	4.06461
UTP22	13	S	1.22017	0.925973	1.07307
UTP22	58	S	#N/A	0.929587	#N/A
UTP22	61	S	#N/A	0.887944	#N/A
UTP30	270	S	#N/A	1.18426	#N/A
UTP6	254	S	0.770113	#N/A	#N/A
UTP8	143	S	#N/A	#N/A	#N/A
UTP8	148	S	0.740761	0.96559	0.853175
UTP8	150	S	#N/A	#N/A	#N/A
UTP9	93	S	#N/A	0.864823	#N/A
UTP9	564	S	#N/A	0.914813	#N/A
VPS71	31	S	#N/A	#N/A	#N/A
WSC4	342	S	#N/A	#N/A	#N/A
WSC4	346	S	#N/A	#N/A	#N/A
XRN1	1510	S	#N/A	0.83761	#N/A
YPR137C-B	1053;1053;1053;1053;1053;1053;1053;1053;1053;1053;1053;1053;1053;1054;1053;1053;1053;1053;1053;494	S	#N/A	#N/A	#N/A
YPR137C-B	1093;1093;1093;1093;1093;1093;1093;1093;1093;1093;1093;1093;1093;1094;1093;1093;1093;1093;1093;1093;1093;534	S	3.22991	#N/A	#N/A
YPR137C-B	1095;1095;1095;1095;1095;1095;1095;1095;1095;1095;1095;1095;1095;1096;1095;1095;1095;1095;1095;1095;1095;536	S	3.22991	2.14595	2.68793
YEF3	1040	S	#N/A	#N/A	#N/A
YEL1	395	S	#N/A	1.09482	#N/A
YER186C	175	S	#N/A	#N/A	#N/A
YER186C	179	S	#N/A	#N/A	#N/A
YHR122W	54	S	#N/A	1	#N/A
YHR122W	68	S	#N/A	1	#N/A
YKR015C	194	S	#N/A	#N/A	#N/A
YKR015C	197	S	#N/A	#N/A	#N/A
YLR012C	94	S	#N/A	#N/A	#N/A
YLR415C	55	S	#N/A	#N/A	#N/A
YLR415C	59	S	#N/A	#N/A	#N/A
YMR147W	92	S	#N/A	#N/A	#N/A
YMR147W	93	S	#N/A	#N/A	#N/A
YPR011C	167	S	#N/A	#N/A	#N/A
YPR011C	169	S	#N/A	#N/A	#N/A
YSW1	600	S	#N/A	#N/A	#N/A
BUD22	257	T	#N/A	#N/A	#N/A
BUD22	284	T	#N/A	#N/A	#N/A
CBF5	396	T	#N/A	#N/A	#N/A
CBF5	402	T	#N/A	#N/A	#N/A
CBF5	378	T	#N/A	#N/A	#N/A
CIC1	11	T	#N/A	#N/A	#N/A
CIC1	15	T	#N/A	#N/A	#N/A
MAK11	436	T	#N/A	#N/A	#N/A
MTR4	34	T	#N/A	#N/A	#N/A
NEW1	1191	T	#N/A	#N/A	#N/A
NOP12	181	T	#N/A	#N/A	#N/A
RSA3	88	T	#N/A	#N/A	#N/A
SGS1	1183	T	#N/A	#N/A	#N/A
TRF5	623	T	#N/A	1.48897	#N/A
UTP14	673	T	0.873485	1.69097	1.28223
UTP14	498	T	#N/A	#N/A	#N/A
UTP18	30	T	#N/A	0.977142	#N/A
UTP18	148	T	#N/A	1.1951	#N/A
UTP18	332	T	#N/A	1.42286	#N/A
UTP18	336	T	#N/A	1.40198	#N/A
UTP22	60	T	0.925546	0.935052	0.930299
UTP8	95	T	0.624267	0.78489	0.704579
ASI3	415	Y	#N/A	#N/A	#N/A
CDC53	87	Y	#N/A	#N/A	#N/A
CMC1	78	Y	#N/A	#N/A	#N/A
CMC1	84	Y	#N/A	#N/A	#N/A
CYK3	561	Y	#N/A	#N/A	#N/A
DOG2	217;217	Y	#N/A	#N/A	#N/A
MAK21	708	Y	#N/A	#N/A	#N/A
MED4	156	Y	#N/A	#N/A	#N/A
MGA1	38	Y	#N/A	#N/A	#N/A
MLH3	77	Y	#N/A	#N/A	#N/A
MMT2	37	Y	#N/A	#N/A	#N/A
MPP10	181	Y	#N/A	#N/A	#N/A
MSH2	23	Y	#N/A	#N/A	#N/A
NCS2	399	Y	#N/A	#N/A	#N/A
NEM1	6	Y	#N/A	#N/A	#N/A
PAM16	82	Y	#N/A	#N/A	#N/A
PEP8	45	Y	#N/A	#N/A	#N/A
PET127	126	Y	#N/A	#N/A	#N/A
PEX15	370	Y	#N/A	#N/A	#N/A
PRP39	202	Y	#N/A	#N/A	#N/A
RGC1	422	Y	#N/A	#N/A	#N/A
RPL24B	14	Y	#N/A	#N/A	#N/A
RPL33A	8;8	Y	#N/A	#N/A	#N/A
RPN2	69	Y	#N/A	#N/A	#N/A
RPN2	70	Y	#N/A	#N/A	#N/A
RPN2	75	Y	#N/A	#N/A	#N/A
SRO7	811	Y	#N/A	#N/A	#N/A
SSK22	468	Y	#N/A	#N/A	#N/A
STD1	288	Y	#N/A	#N/A	#N/A
VPS64	240	Y	#N/A	#N/A	#N/A
VPS71	29	Y	#N/A	#N/A	#N/A
YER186C	181	Y	#N/A	#N/A	#N/A
YGR127W	170	Y	#N/A	0.926857	#N/A
YRF1-4	151;451;436;436;565;565;565;629;629;629	Y	#N/A	#N/A	#N/A

## Sheet: 7. RPSs (S10 Fig)
H/L ratios normalized to bait (Pwp2). Average of two experiments shown (extracted from data in tabs 1-3). Proteins in bold in TBB experiment were quantified only in one of two biological replicas.
Diauxic shift				TBB treatment				Rapamycin treatment
Name	H/L			Name	H/L			Name	H/L
RPS12	2.69259			RPS16B	4.20056			RPS7A	0.827371
RPS9B	2.09501			RPS12	3.65288			RPS12	0.825056
RPS16B	1.98002			RPS14A	3.31279			RPS23B	0.787811
RPS7A	1.90782			RPS31	2.83554			RPS22B	0.765908
RPS23B	1.89451			RPS13	2.82576			RPS6B	0.75245
RPS22B	1.84625			RPS5	2.82396			RPS26B	0.745472
RPS24B	1.78928			RPS8B	2.76708			ASC1	0.736897
RPS6B	1.74096			RPS25B	2.62886			RPS16B	0.729736
RPS5	1.72443			RPS23B	2.61196			RPS20	0.72739
RPS8B	1.71932			RPS0B	2.59066			RPS18B	0.725063
RPS18B	1.64078			RPS11B	2.4005			RPS24B	0.724616
RPS11B	1.53977			RPS15	2.23377			RPS31	0.718887
RPS14A	1.53379			RPS22B	2.10135			RPS17B	0.700333
RPS4B	1.46825			ASC1	1.91517			RPS3	0.695189
RPS20	1.42959			RPS6B	1.90273			RPS0B	0.688604
RPS2	1.39012			RPS2	1.87465			RPS9A	0.683923
RPS7B	1.32153			RPS17B	1.83675			RPS13	0.678996
RPS13	1.31721			RPS24B	1.82583			RPS2	0.678406
RPS17B	1.25976			RPS27B	1.82447			RPS15	0.66577
RPS26B	1.21971			RPS3	1.82409			RPS14B	0.662929
RPS3	1.21961			RPS20	1.79496			RPS8B	0.661588
RPS15	1.19108			RPS1B	1.75736			RPS11B	0.65822
ASC1	1.01599			RPS4B	1.75136			RPS5	0.654379
RPS25B	0.967341			RPS1A	1.69373			RPS1A	0.653846
RPS1A	0.952806			RPS7A	1.62719			RPS1B	0.647812
RPS31	0.950824			RPS9A	1.59934			RPS10B	0.643295
RPS1B	0.841602			RPS18B	1.55158			RPS4B	0.63197
RPS27B	0.327542			RPS26B	1.41021			RPS28B	0.625503
				RPS7B	1.3848			RPS7B	0.61137
								RPS25B	0.608034
								RPS19B	0.602259
								RPS27B	0.598711
