# Supplementary material for: Tor1 and CK2 kinases control a switch between alternative ribosome biogenesis pathways in a growth-dependent manner
Source: PLoS Biol. 2017 Mar 10;15(3):e2000245. doi: 10.1371/journal.pbio.2000245 (PMC5345768; doi:10.1371/journal.pbio.2000245)
Supplement: S1 Table — (XLSX) [file pbio.2000245.s009.xlsx]

## Sheet: Rapamycin sensitive proteins
		Quantified fold-change of phosphorylation in wild type cells treated with rapamycin from two screens performed by Huber et al. 2009
				Soulard et al. 2010	Oliveira et al. 2015
Gene	Systematic Name	Rapamycin wt (Sch9 screen)	Rapamycin wt (tap42-11 screen)	Rapamycin	Rapamycin
ARB1	YER036C				2.11192
BCD1	YHR040W	0.511468
BUD21	YOR078W	1.16005	0.965272
CBF5	YLR175W		1.05919		5.03051
CIC1	YHR052W	22.2835			2.07911
DBP10	YDL031W	0.0088594	2.11737
DBP7	YKR024C		1
EBP2	YKL172W				0.458253
ENP2	YGR145W		0.938551
ESF1	YDR365C	0.831249	0.492863		2.42728
FAP7	YDL166C	0.312171	1.30951
FCF2	YLR051C		1.20744
KRI1	YNL308C	0.645613	0.857173
MAK11	YKL021C		1.13075
MAK21	YDR060W		1.05911
MPP10	YJR002W	0.838067	0.838426
NOC2	YOR206W	0.773689	0.968675	2.62
NOP19	YGR251W	1.14207	0.835446
NOP58	YOR310C	1.44586	0.827948
PWP2	YCR057C	0.828886	0.0698558
REI1	YBR267W				2.78601
RPA43	YOR340C	99.374	1.10921
RPC19	YNL113W	1.03881	0.861415		2.1584
RPS9B	YBR189W	1.26944	0.976633
RRP12	YPL012W	0.703525	0.657567
RRP12	YPL012W	0.703525	0.657567
RRP14	YKL082C	0.0529579	0.00430887
RRP3	YHR065C	0.915573	0.509577
RRP36	YOR287C	0.714933	0.865753
RRP5	YMR229C	0.760432	0.568203
RSA3	YLR221C	0.40068	0.86725
SAS10	YDL153C	0.787326	0.711748		0.0663367
UTP14	YML093W	0.819851	20.6308		0.331508
UTP22	YGR090W	1.02853	1.17857
UTP5	YDR398W	0.730649	0.858721

## Sheet: Phosphogrid sites
List of previously identified phosphorylation sites in ribosome biogenesis factors mined from Phosphogrid.
Systematic name	Name	Phosphosite	Pubmed IDs
YPL217C	BMS1	S478	21177495|20489023|20702584|18407956|19779198
YOL077C	BRX1	S285	20702584|18407956|19823750|19779198|19795423
YOR078W	BUD21	S144	21177495|21126336|20702584|18407956|19684113|19823750|19779198|19795423|17563356|17330950
YLR175W	CBF5	S47	21177495|18407956|19684113|19823750|19779198|19795423|17287358
YLR175W	CBF5	T378	21177495|21126336|20702584|18407956|19779198|17563356|17287358|17330950
YLR175W	CBF5	S395	21177495|20190278|21126336|20702584|19823750|19779198|19795423
YLR175W	CBF5	S398	21177495|20702584|18407956|19823750|19779198|19795423
YLR175W	CBF5	S399	21177495|20190278|20702584|18407956|19823750|19779198|19795423|17563356
YHR052W	CIC1	S365	21177495|20702584|19779198|17330950
YHR052W	CIC1	S366	21177495|20702584|18407956|17563356|17330950
YDL031W	DBP10	S101	20702584|18407956|19823750|19779198|19795423|17330950
YDL031W	DBP10	S392	20702584
YDL031W	DBP10	S398	20702584|18407956|19684113|17563356|11875433
YDL031W	DBP10	S400	20702584|19684113|18407956|17563356|11875433
YNL112W	DBP2	S88	21177495|20702584|18407956|19779198|17563356
YNL112W	DBP2	S90	21177495|20702584|18407956|19779198|17563356|17287358|17330950
YLR129W	DIP2	T375	19684113
YLR129W	DIP2	S376	19684113
YLL008W	DRS1	S208	21126336|20702584|18407956|19779198|17563356
YKL172W	EBP2	S104	21177495|20702584|18407956|19823750|19779198|19795423|17330950
YKL172W	EBP2	S110	21177495|20702584|18407956|19823750|19779198|19795423|17330950
YGR145W	ENP2	S529	20702584|18407956|19684113|19779198|17563356|17287358|17330950
YGR145W	ENP2	S550	21177495|20702584|18407956|19779198|17563356
YGR145W	ENP2	S555	21177495|20702584|18407956|19779198|17563356
YMR049C	ERB1	S20	21126336|20702584|19823750|19795423|17287358
YMR049C	ERB1	S23	20702584|18407956|19823750|19795423|17287358|17330950
YDR365C	ESF1	S86	21177495|21126336|20702584|18407956|19684113|19823750|19779198|19795423|17330950
YDR365C	ESF1	S223	21177495|21126336|20702584|18407956|19823750|19779198|19795423|17330950
YDR365C	ESF1	S225	21177495|20702584|18407956|19684113|19823750|19779198|19795423|17287358|17330950
YDR365C	ESF1	Y364	19684113
YDR365C	ESF1	S367	21177495|21126336|20702584|19684113|19779198|17330950
YDR365C	ESF1	S369	21177495|21126336|20702584|18407956|19684113|19779198|17330950
YDR365C	ESF1	S372	21177495|20702584|18407956|19684113|19779198|17330950
YNR054C	ESF2	S7	20702584|19779198|17330950
YNR054C	ESF2	S13	20702584|19823750|19779198|19795423|17330950
YNR054C	ESF2	S14	20702584|19823750|19779198|19795423|17330950
YNR054C	ESF2	S47	21177495|21126336|20702584|19823750|19795423|17563356
YNR054C	ESF2	S51	21177495|21126336|20702584|19823750|19795423
YDL166C	FAP7	S188	20702584|19684113|19823750|19779198|19795423|11875433
YDL166C	FAP7	S196	20702584|19684113|19823750|19779198|19795423|11875433
YMR290C	HAS1	S14	20702584|18407956
YJL033W	HCA4	S710	20702584|18407956|19823750|19779198|19795423
YJL033W	HCA4	S714	20702584|18407956|19823750|19779198|19795423
YNL308C	KRI1	S177	21177495|20702584|18407956|19684113|19779198|17330950
YNL308C	KRI1	S184	21177495|20702584|18407956|19684113|19779198|17330950
YNL308C	KRI1	S185	21177495|20702584|19684113|19779198
YNL308C	KRI1	Y482	21177495|19684113|17330950
YNL308C	KRI1	S486	21177495|21126336|20702584|18407956|19684113|19779198|17563356|15665377|17330950
YNL308C	KRI1	S489	21177495|20702584|18407956|19779198|17563356
YKL021C	MAK11	S430	21177495|20702584|18407956|19684113|19823750|19779198|19795423|17563356|15665377|17330950
YKL021C	MAK11	S434	21177495|20702584|18407956|19684113|19823750|19779198|19795423|17563356|17330950
YDR060W	MAK21	S73	21177495|20702584|18407956|19823750|19779198|19795423|17563356|17330950
YDR060W	MAK21	S80	21177495|20702584|18407956|19779198|17563356|17330950
YDR060W	MAK21	S710	20702584|18407956|19684113|19823750|19779198|19795423|17563356|15665377|17330950
YDR060W	MAK21	S971	19684113
YDR060W	MAK21	S972	19684113|17330950
YDR060W	MAK21	S977	19684113|17330950
YDR060W	MAK21	S978	19684113|17330950
YDR060W	MAK21	S1024	19684113|19823750|19795423
YBR142W	MAK5	S678	21177495|20489023|21126336|20702584|18407956|19823750|19779198|19795423|17563356|17330950
YJR002W	MPP10	S176	21177495|20702584|18407956|19684113|19823750|19779198|19795423|17563356|17287358|17330950
YJR002W	MPP10	S177	21177495|20702584|18407956|19684113|19823750|19779198|19795423|17563356|17287358|17330950
YKL009W	MRT4	S184	20702584|18407956
YOR206W	NOC2	S70	20702584|18407956|19823750|19779198|19795423|17330950
YOR206W	NOC2	S698	19684113|19823750|19795423|17330950
YOR206W	NOC2	S708	19684113|19823750|19795423
YLR002C	NOC3	S49	20702584|18407956
YNR053C	NOG2	S85	20702584|18407956|19779198
YOL041C	NOP12	S70	20702584|18407956|19779198|17563356|17330950
YOL041C	NOP12	T181	20702584|18407956|19779198|17330950
YOL041C	NOP12	S184	21177495|20489023|20702584|18407956|19823750|19779198|19795423|17563356|17287358|17330950
YOL041C	NOP12	S212	20702584|18407956
YER002W	NOP16	S176	20702584|17287358
YPL043W	NOP4	S247	21177495|20702584|19779198|17330950
YPL146C	NOP53	S31	20702584|18407956|19684113|19823750|19779198|19795423|17563356
YLR197W	NOP56	S376	19684113
YOR310C	NOP58	S438	19684113
YOL144W	NOP8	S268	20702584|18407956|19823750|19779198|19795423|17563356|17330950
YOL144W	NOP8	S370	20702584|18407956|19684113|19823750|19779198|19795423|17563356|17287358|17330950
YDR432W	NPL3	S224	21177495|20190278|21126336|20702584|18407956|19779198|17563356|15665377|17330950
YCR057C	PWP2	S232	21177495|20702584|18407956|19684113|19823750|19779198|19795423|17563356|17330950
YCR057C	PWP2	S912	20702584|19684113|19823750|19779198|19795423|17330950
YCR057C	PWP2	S913	20702584|19684113|19823750|19779198|19795423|17330950
YGR280C	PXR1	S230	20702584|18407956|19779198
YNL163C	RIA1	S430	21126336|20702584|18407956|19779198|17563356
YJL148W	RPA34	S10	19684113|19823750|19779198|19795423|17330950|18084032
YJL148W	RPA34	S12	19684113|19779198|17330950|18084032
YJL148W	RPA34	S14	19684113|19823750|19779198|19795423|17330950
YOR340C	RPA43	S265	21126336|20702584|18407956|19779198
YNL113W	RPC19	T15	21177495|20702584|18407956|19779198|17563356
YNL113W	RPC19	T33	21177495|20702584|18407956|19684113|19823750|19779198|19795423|17330950
YIL148W	RPL40A	Y100	19684113
YCR031C	RPS14A	S11	21126336|18407956|19684113|19779198|17287358
YPL090C	RPS6A	S232	19684113|11875433|3299046|15665377
YPL090C	RPS6A	S233	19684113|11875433|3299046|15665377
YBR181C	RPS6B	S232	21177495|19684113|19823750|19779198|19795423|11875433|3299046|15665377
YBR181C	RPS6B	S233	21177495|19684113|19823750|19779198|19795423|11875433|3299046|15665377
YOR096W	RPS7A	S115	20702584
YOR096W	RPS7A	T117	20702584|19684113
YNL096C	RPS7B	S31	20702584|18407956|19823750|19779198|19795423|15665377|17330950
YNL096C	RPS7B	S115	21177495|20702584|18407956|17287358
YNL096C	RPS7B	T117	21177495|20702584|17287358
YPL081W	RPS9A	T161	20702584
YPL081W	RPS9A	S184	21126336|20702584
YBR189W	RPS9B	S9	20702584|19779198|17330950
YBR189W	RPS9B	T161	20702584
YBR189W	RPS9B	S184	21126336|20702584|18407956|19684113|19823750|19779198|19795423|15665377|17330950
YMR131C	RRB1	S5	20702584|18407956|19779198
YPL012W	RRP12	S1059	21126336|19684113|19779198|17330950
YPL012W	RRP12	S1067	19684113|19779198|17330950
YKL082C	RRP14	S230	19684113|19823750|19795423
YKL082C	RRP14	S232	19684113|19823750|19795423
YKL082C	RRP14	S239	19684113|19823750|19795423
YPR143W	RRP15	S69	21177495|20702584|19823750|19779198|19795423|17330950
YHR065C	RRP3	S43	21177495|19779198|21126336|20702584|18407956|19684113|19823750|19795423|17330950
YHR065C	RRP3	S45	21177495|19779198|21126336|20702584|19684113|19823750|19795423|17330950
YHR065C	RRP3	S47	21177495|19779198|20702584|18407956|19684113|19823750|19795423|17330950
YHR065C	RRP3	T52	20702584|19823750|19795423
YOR287C	RRP36	S14	18407956|19684113|19779198|17563356|17330950
YOR287C	RRP36	S41	21177495|20702584|18407956|19684113|19823750|19779198|19795423|17287358|17330950
YOR287C	RRP36	S42	21177495|20702584|18407956|19684113|19823750|19779198|19795423|17287358|17330950
YMR229C	RRP5	S187	21177495|21126336|20702584|18407956|19684113|19823750|19779198|19795423|17563356|17287358|17330950
YMR229C	RRP5	S188	21177495|21126336|20702584|18407956|19684113|19823750|19779198|19795423|17563356|17287358|17330950
YLR221C	RSA3	S7	19684113
YDL153C	SAS10	S314	18407956|19684113|19779198
YDL153C	SAS10	S316	18407956|19684113|19779198
YDL153C	SAS10	S336	21177495|21126336|20702584|18407956|19684113|19823750|19779198|19795423|17563356|17287358
YDL153C	SAS10	S339	21177495|21126336|20702584|18407956|19684113|19823750|19779198|19795423|17563356|17287358
YDL153C	SAS10	S477	21177495|18407956|19684113|19823750|19779198|19795423|17563356|17330950
YGR245C	SDA1	S278	20702584|19779198|17563356|17330950
YGR245C	SDA1	S603	20702584|19823750|19779198|19795423
YGR245C	SDA1	S605	20702584|19779198
YGR245C	SDA1	S610	20702584|19823750|19779198|19795423
YPR016C	TIF6	S231	21177495|21126336|20702584|18407956|19779198|17330950
YOR006C	TSR3	S286	19684113|19779198|17563356|17330950
YOR006C	TSR3	S289	19684113|19823750|19779198|19795423|17563356|17330950
YML093W	UTP14	S34	21177495|18407956|19684113|19779198|17563356|17330950
YML093W	UTP14	S35	21177495|18407956|19684113|19779198|17563356|17330950
YML093W	UTP14	S423	21177495|20702584|18407956|19684113|17563356|17330950
YML093W	UTP14	S424	21177495|20702584|18407956|19684113|19823750|19779198|19795423|17563356|17330950
YML093W	UTP14	S488	21177495|20702584|18407956|19823750|19779198|19795423
YML093W	UTP14	S562	20702584|18407956|19684113|19823750|19779198|19795423|17563356|17330950
YML093W	UTP14	S668	20702584|18407956|19823750|19795423|17287358
YML093W	UTP14	T673	20702584|19823750|19795423
YML093W	UTP14	S738	21177495|21126336|20702584|18407956|19684113|19823750|19779198|19795423|17287358|17330950
YGR090W	UTP22	S10	21177495|20702584|18407956|19684113|19823750|19779198|19795423|17563356|17287358|17330950
YGR090W	UTP22	T12	20702584|17287358
YGR090W	UTP22	S58	21177495|20702584|19684113|19779198|17330950
YIL091C	UTP25	S155	20702584|19823750|19795423
YDR398W	UTP5	S629	19684113|19823750|19795423
YDR398W	UTP5	S638	19684113
YGR128C	UTP8	S148	20702584|18407956|19823750|19779198|19795423|17330950
YGR251W	YGR251W	S156	20702584
YGR251W	YGR251W	Y162	20702584
YGR251W	YGR251W	S163	20702584|18407956|19684113|19779198
YGR251W	YGR251W	S165	20702584|18407956|19684113|19779198
